# Supplementary material for: Synthesis and characterization of bis(dithiafulvenyl)-substituted fluorenones and fluorenylidene-1,3-dithioles
Source: Royal Society of Chemistry journal article supplement (doi:10.1039/d0nj01495h), 2020-01-01
Supplement: d0nj01495h1.pdf [file d0nj01495h1.pdf]

*Electronic Supplementary Information for*

# **Synthesis and characterization of bis(dithiafulvenyl)-substituted fluorenones and fluorenylidene-1,3-dithioles**

*Fatemeh Salami, and Yuming Zhao\**

Department of Chemistry, Memorial University of Newfoundland

St. John's, NL, Canada A1B 3X7

Email: [yuming@mun.ca](mailto:yuming@mun.ca)

## **Table of Contents**

|                                                               |      |
|---------------------------------------------------------------|------|
| <b>1. NMR Spectra for New Compounds</b>                       | S-2  |
| <b>2. UV-Vis Absorption Data</b>                              | S-20 |
| <b>3. Crystallographic Data for Compounds 5a, 10a, and 12</b> | S-21 |

# 1. NMR Spectra for New Compounds

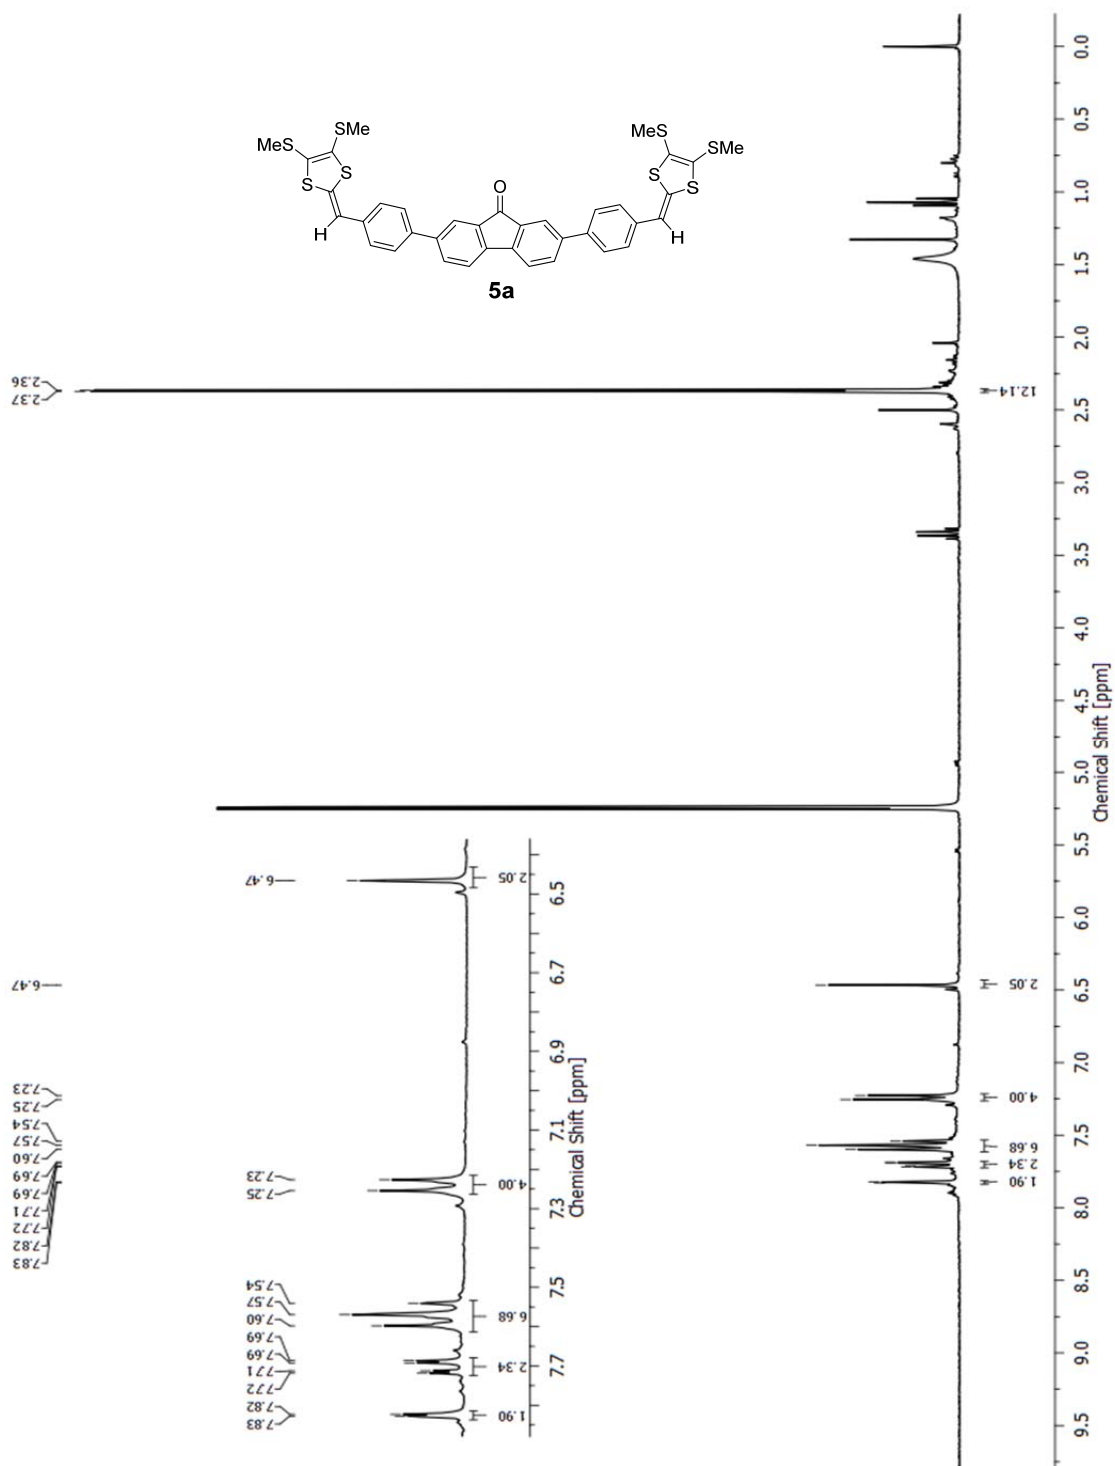

**Fig. S-1.**  $^1\text{H}$  NMR (300 MHz,  $\text{CD}_2\text{Cl}_2$ ) spectrum of compound **5a**.

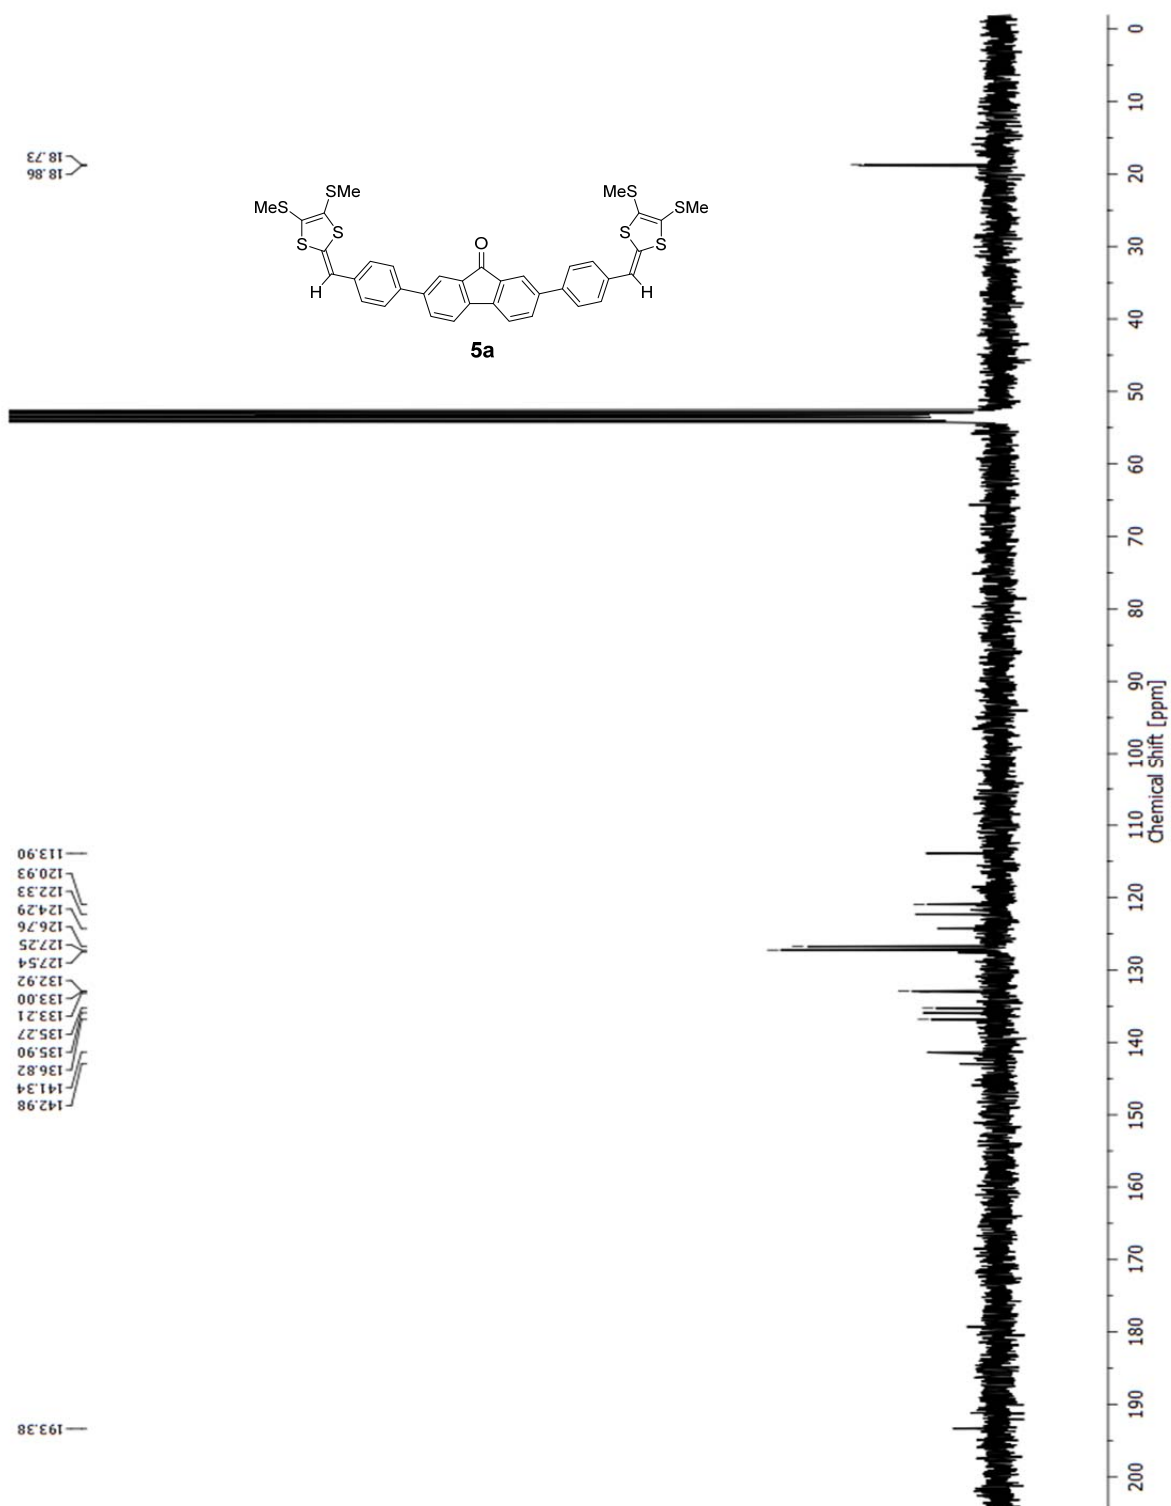

**Fig. S-2**  $^{13}\text{C}$  NMR (75 MHz,  $\text{CD}_2\text{Cl}_2$ ) spectrum of compound **5a**.

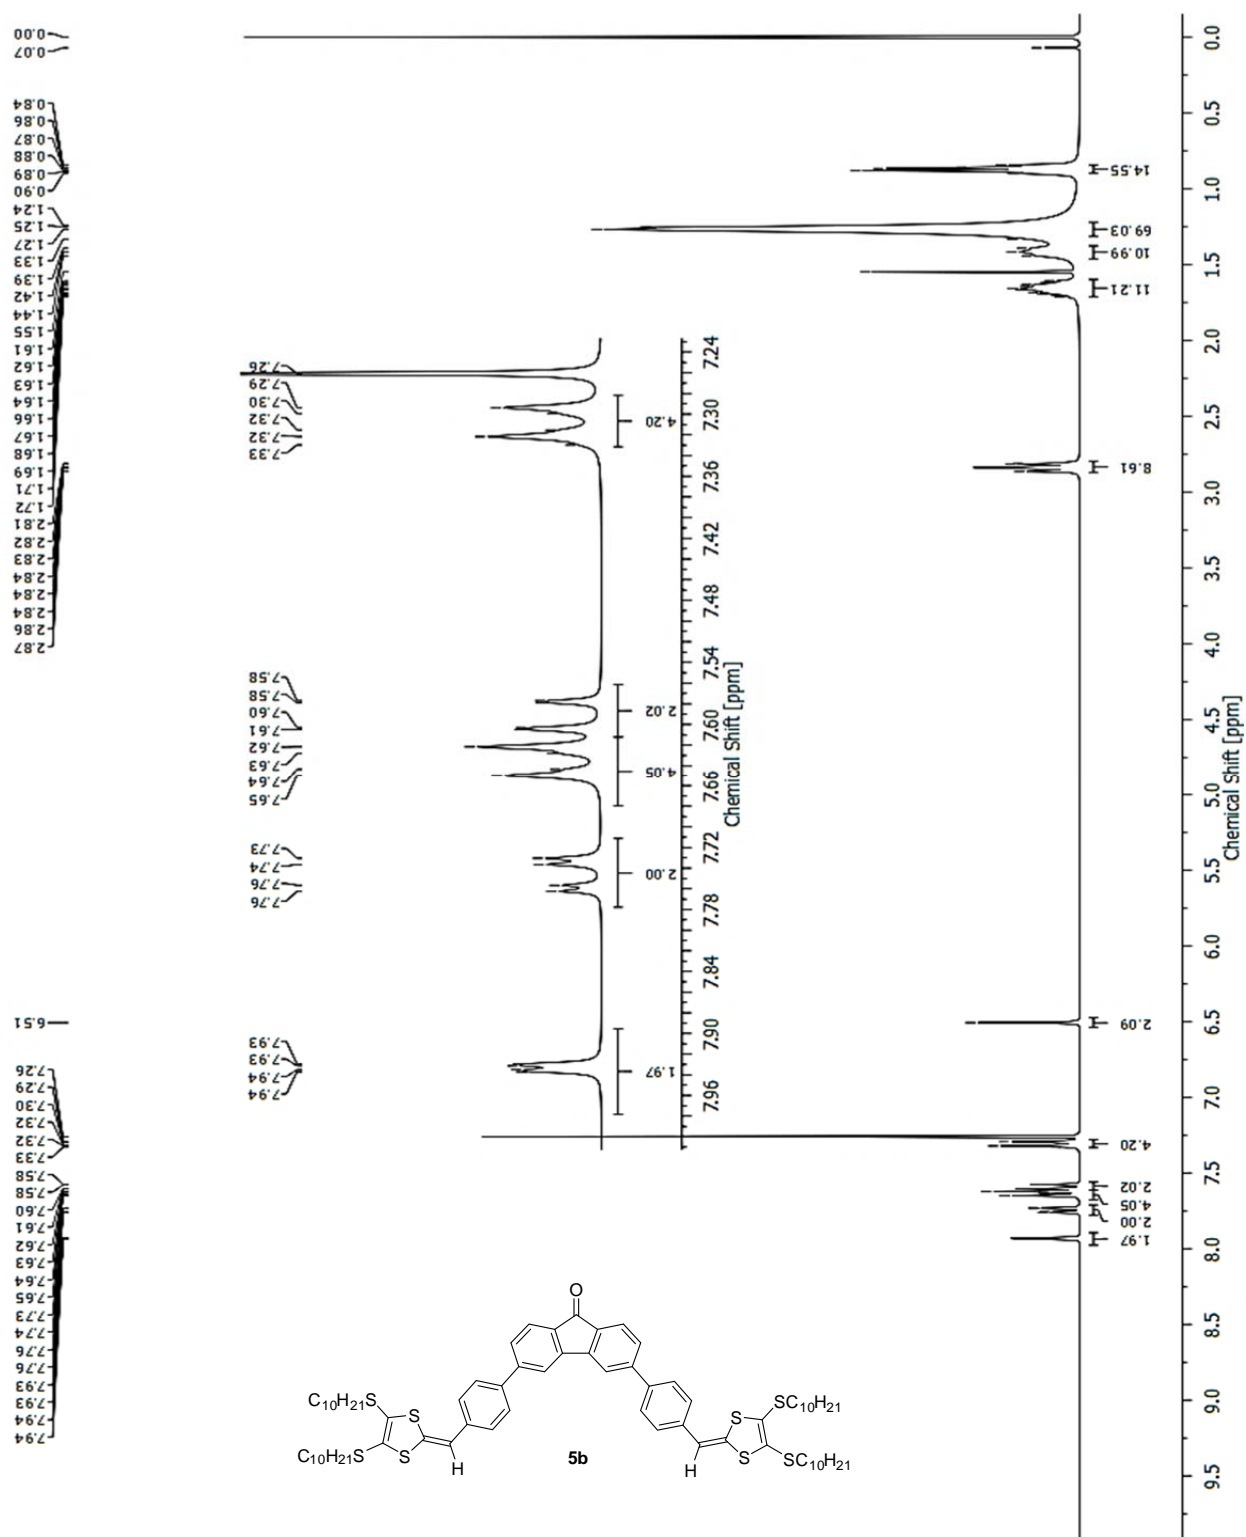

Fig. S-3 <sup>1</sup>H NMR (300 MHz, CDCl<sub>3</sub>) spectrum of compound **5b**.

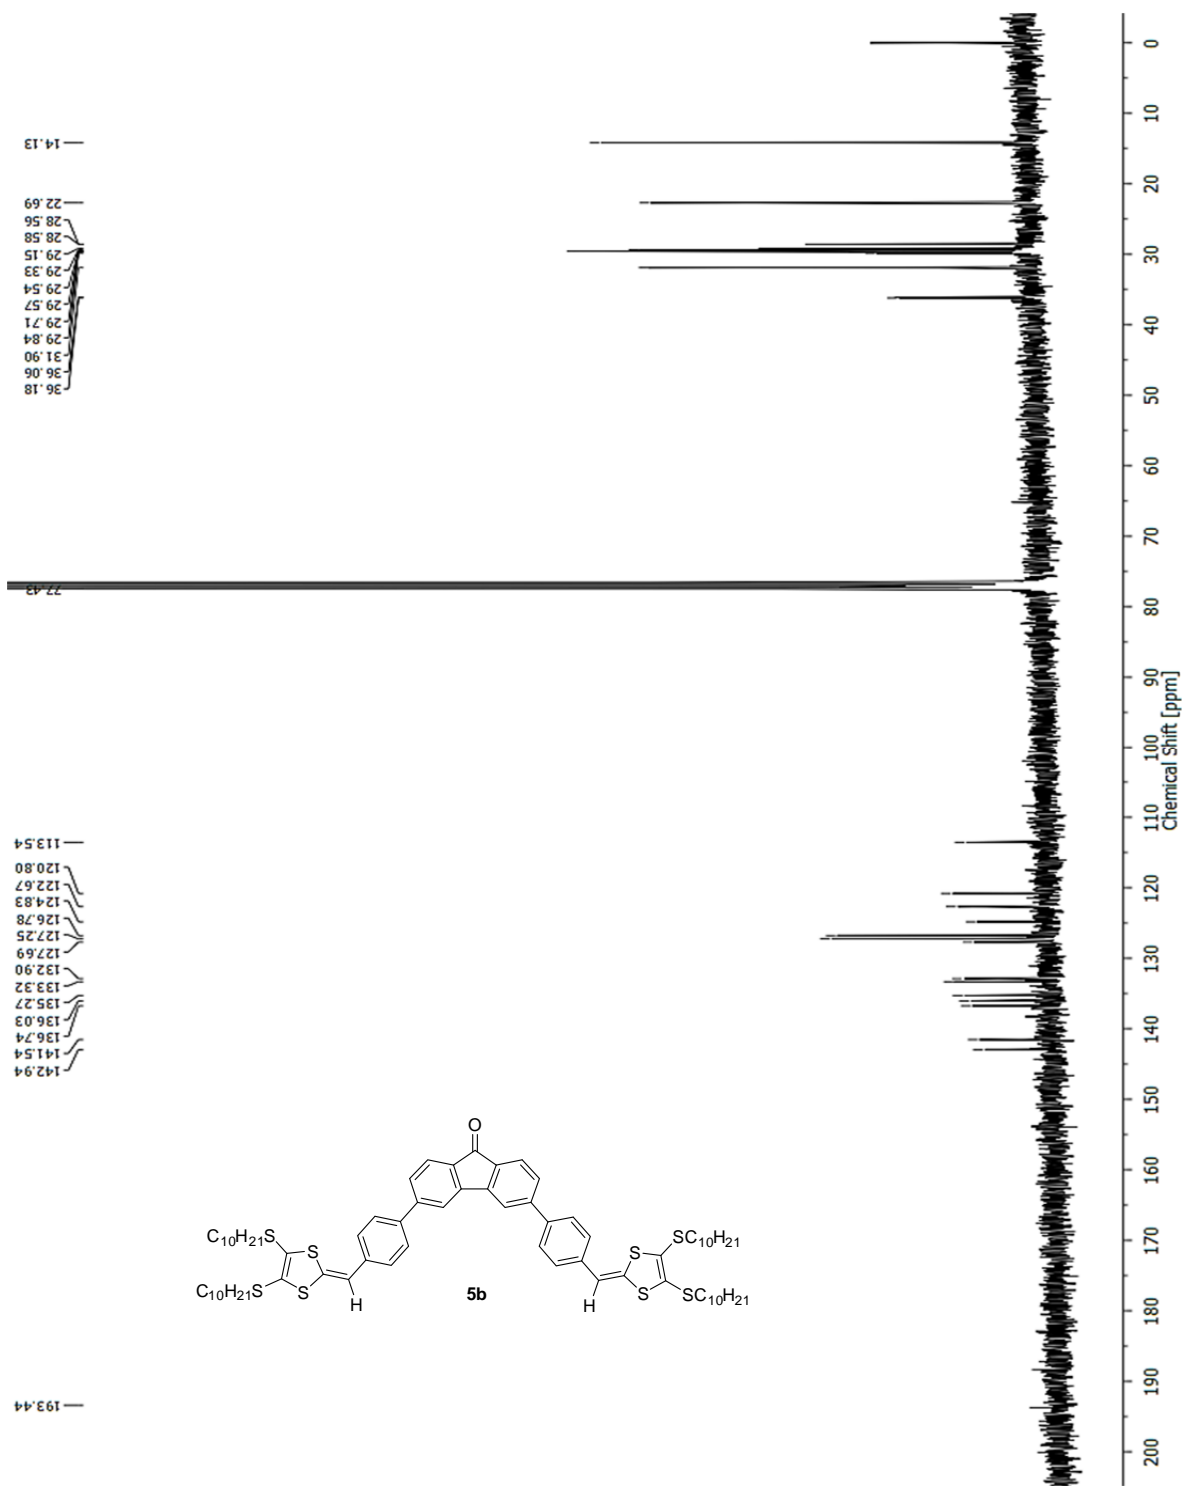

**Fig. S-4** <sup>13</sup>C NMR (75 MHz, CDCl<sub>3</sub>) spectrum of compound **5b**.

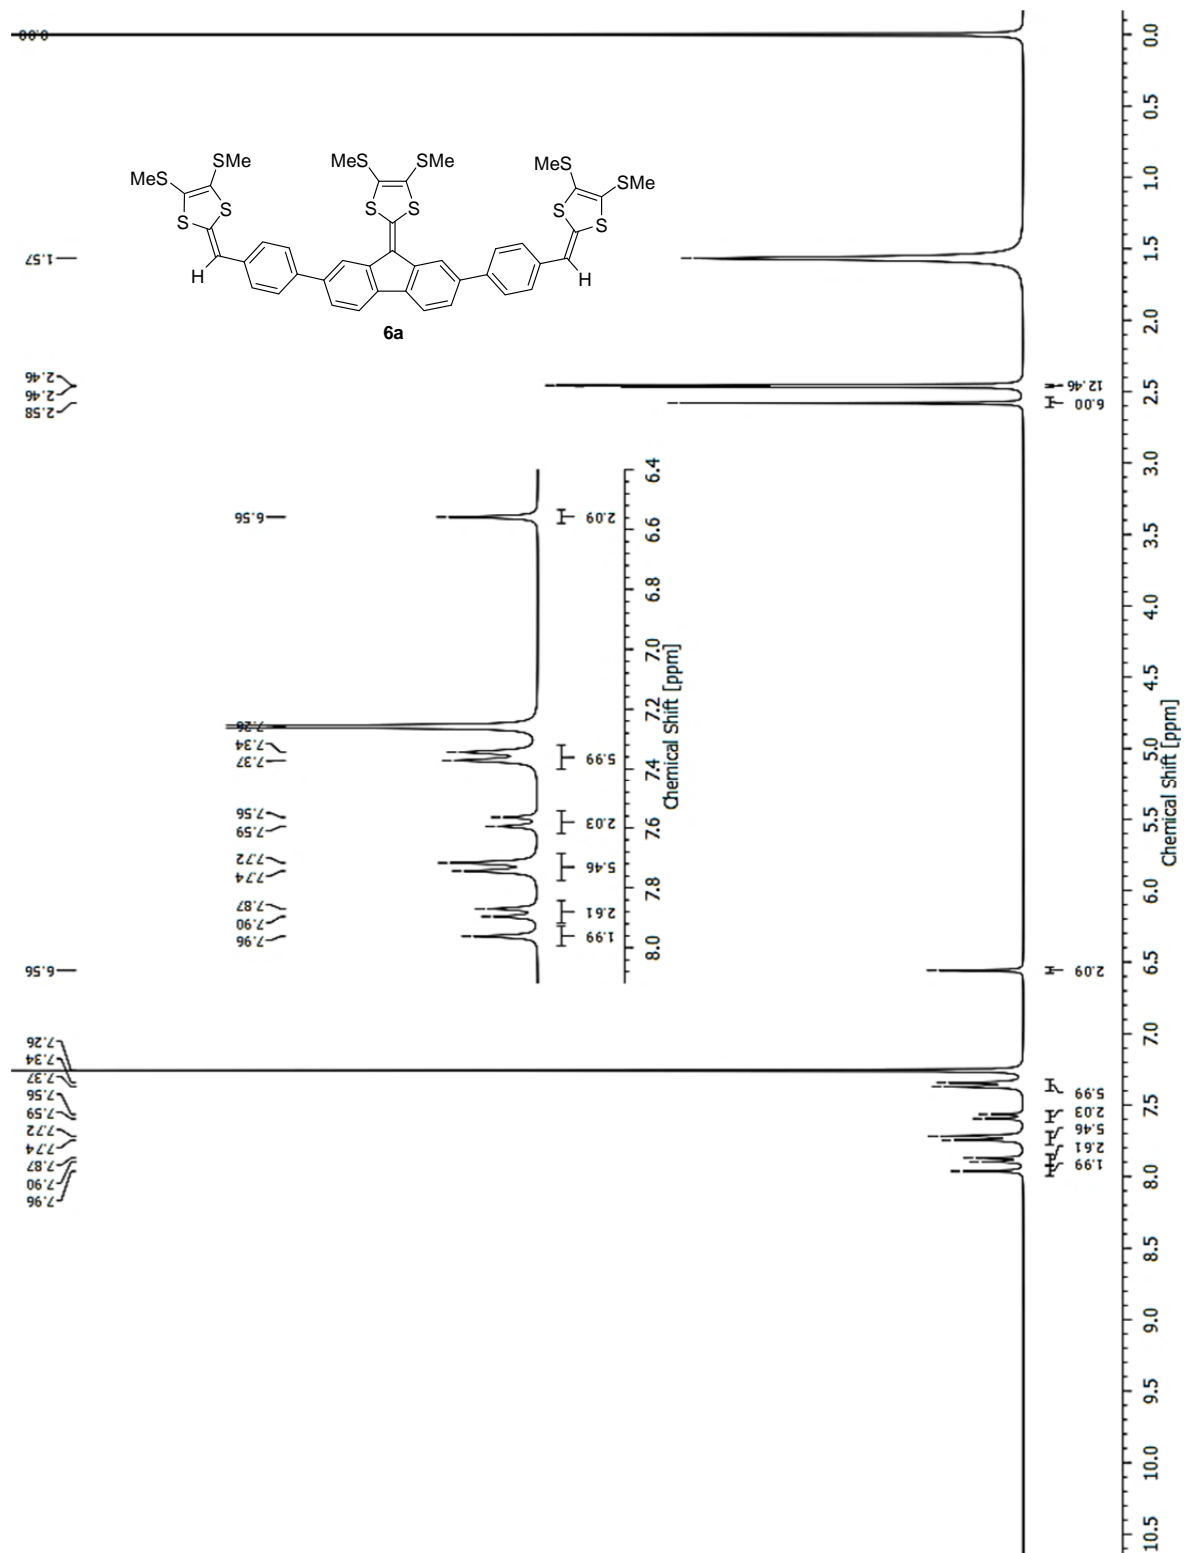

**Fig. S-5**  $^1\text{H}$  NMR (300 MHz,  $\text{CDCl}_3$ ) spectrum of compound **6a**.

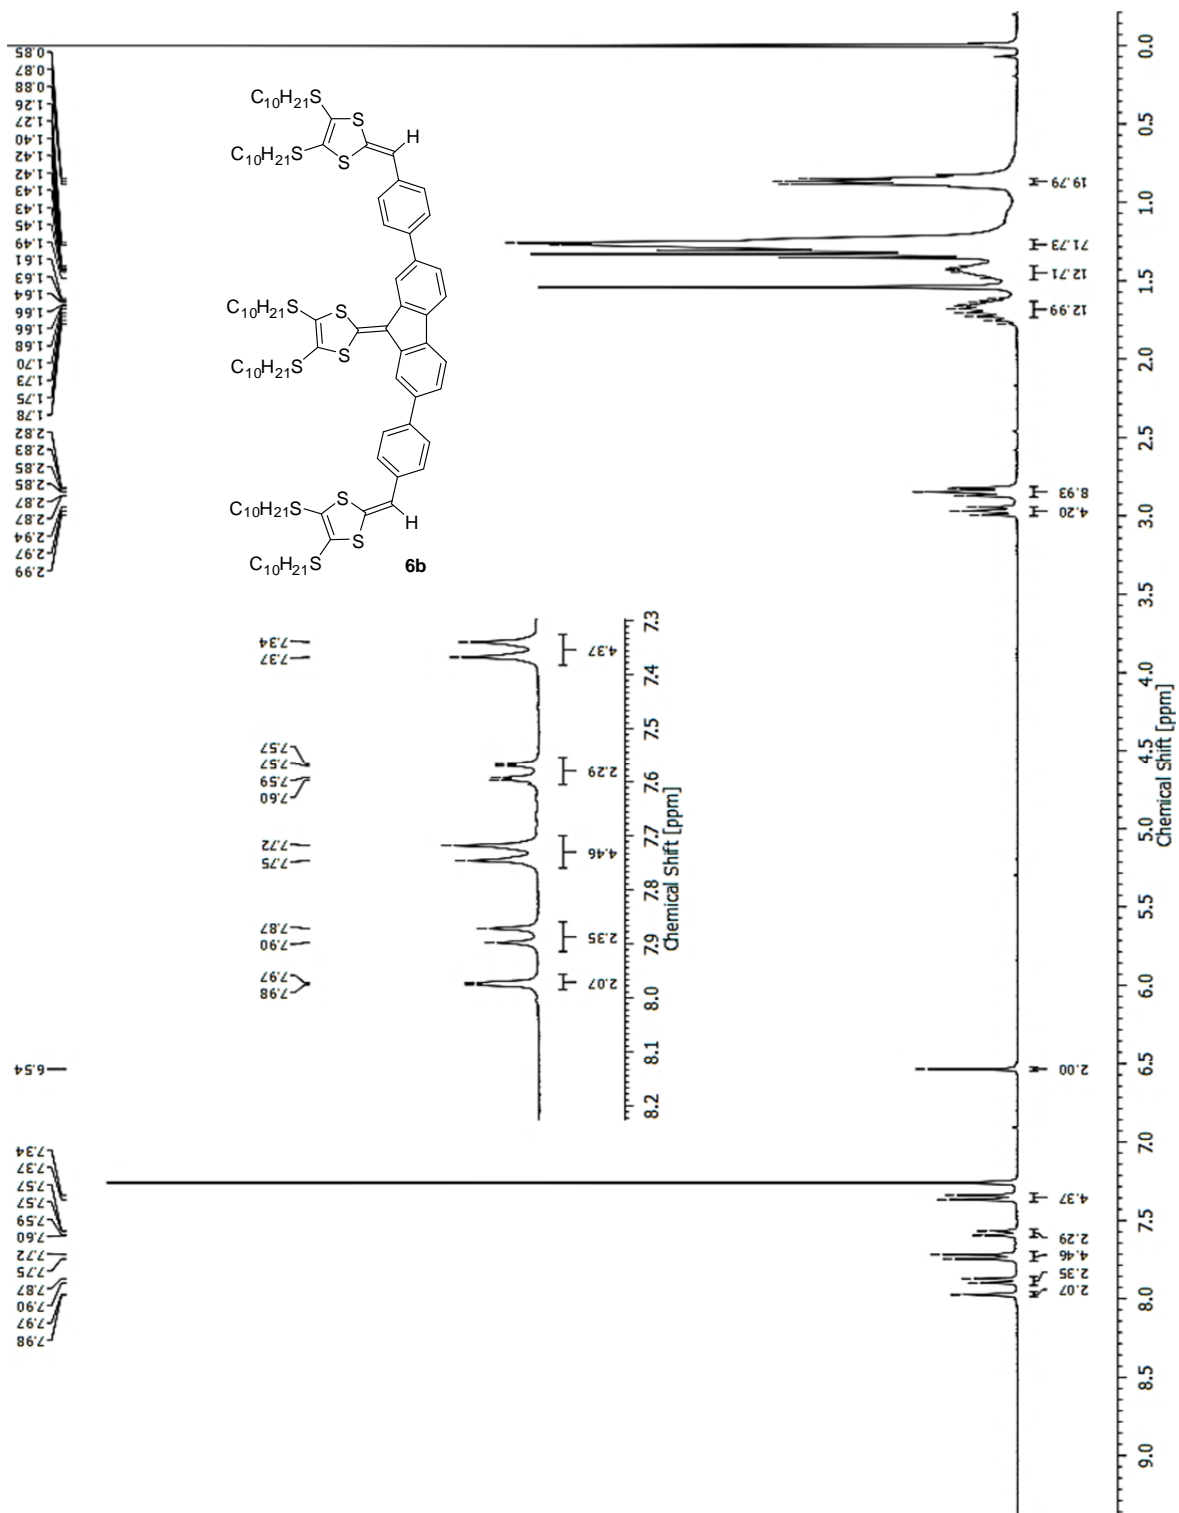

**Fig. S-6**  $^1H$  NMR (300 MHz,  $CDCl_3$ ) spectrum of compound **6b**.

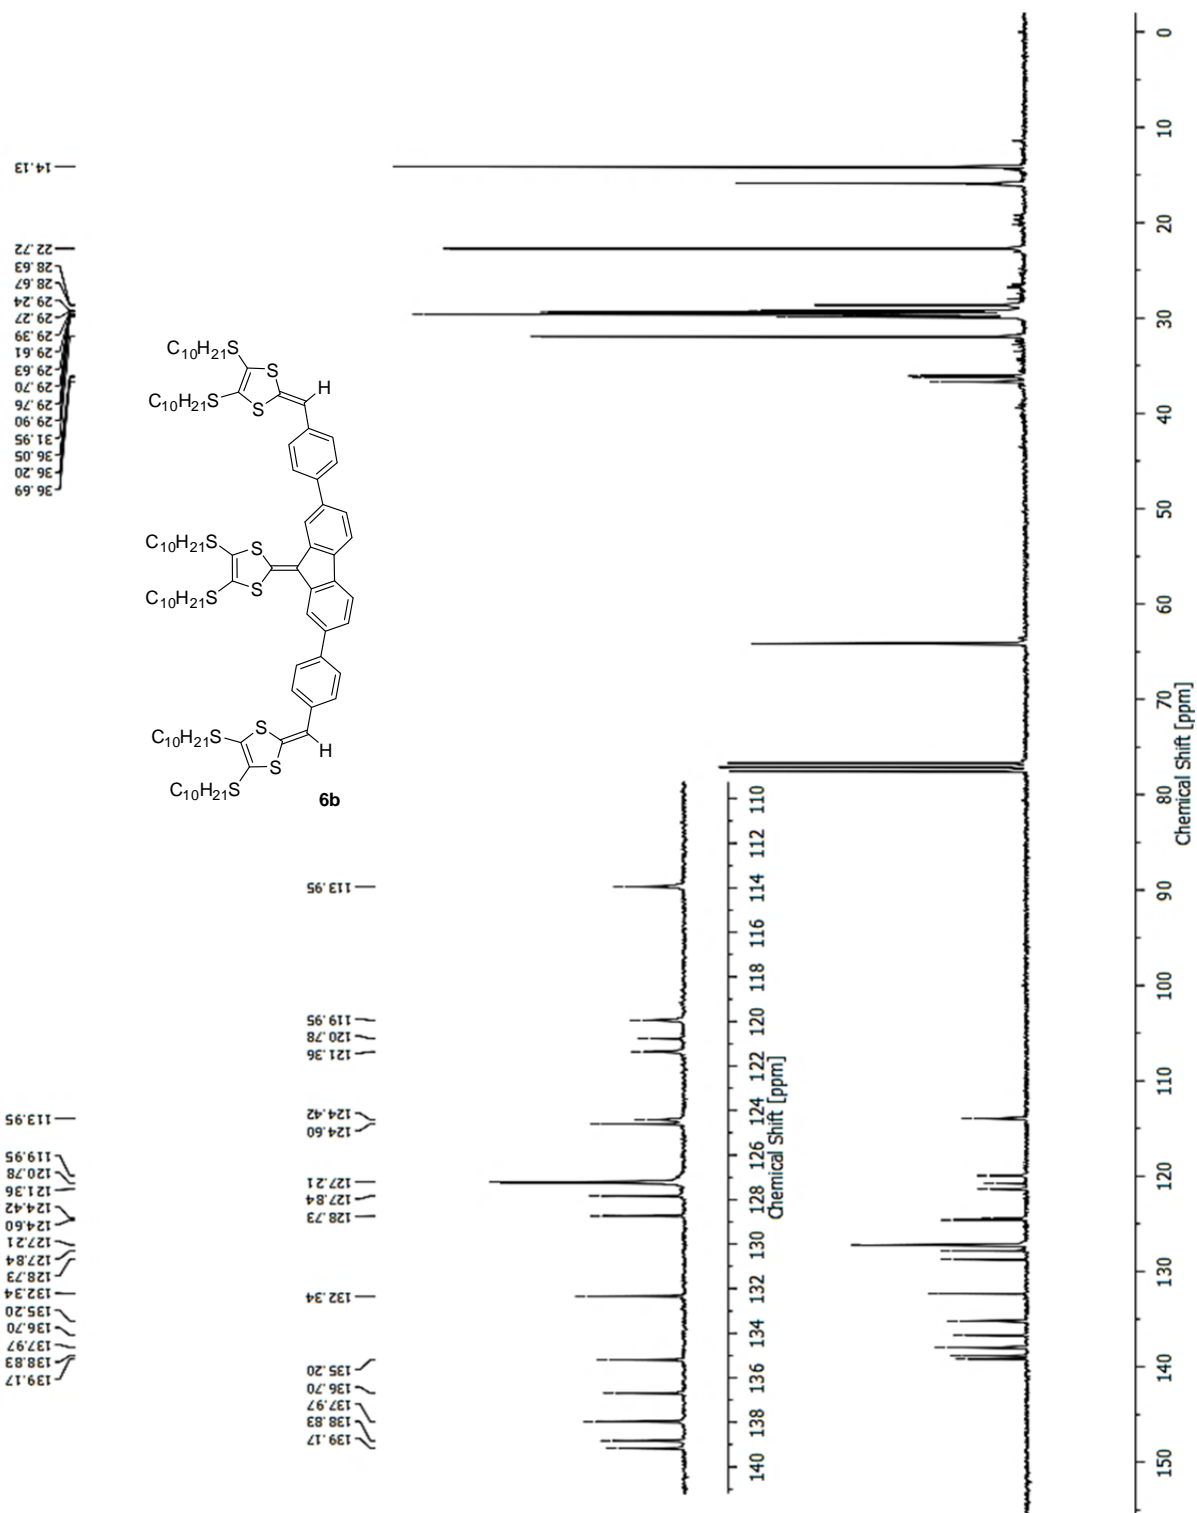

**Fig. S-7**  $^{13}C$  NMR (75 MHz,  $CDCl_3$ ) spectrum of compound **6b**.



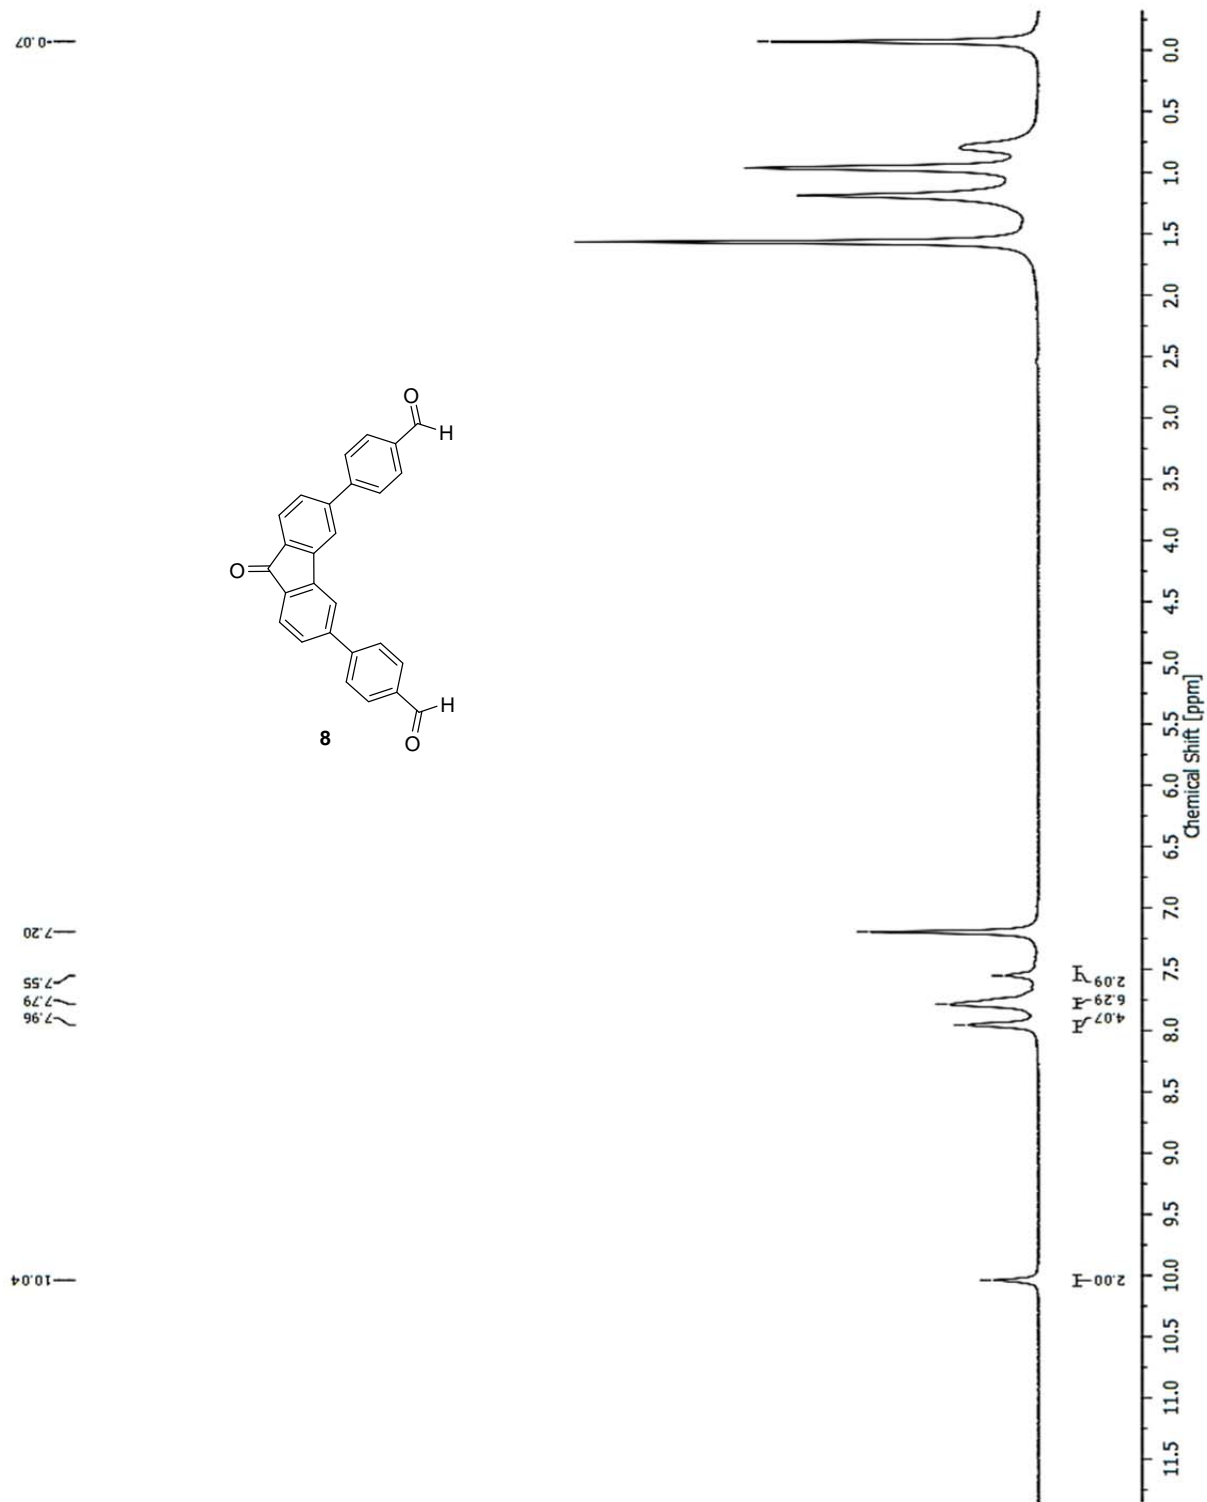

**Fig. S-8**  $^1\text{H NMR}$  (300 MHz,  $\text{CDCl}_3$ ) spectrum of compound **8**.

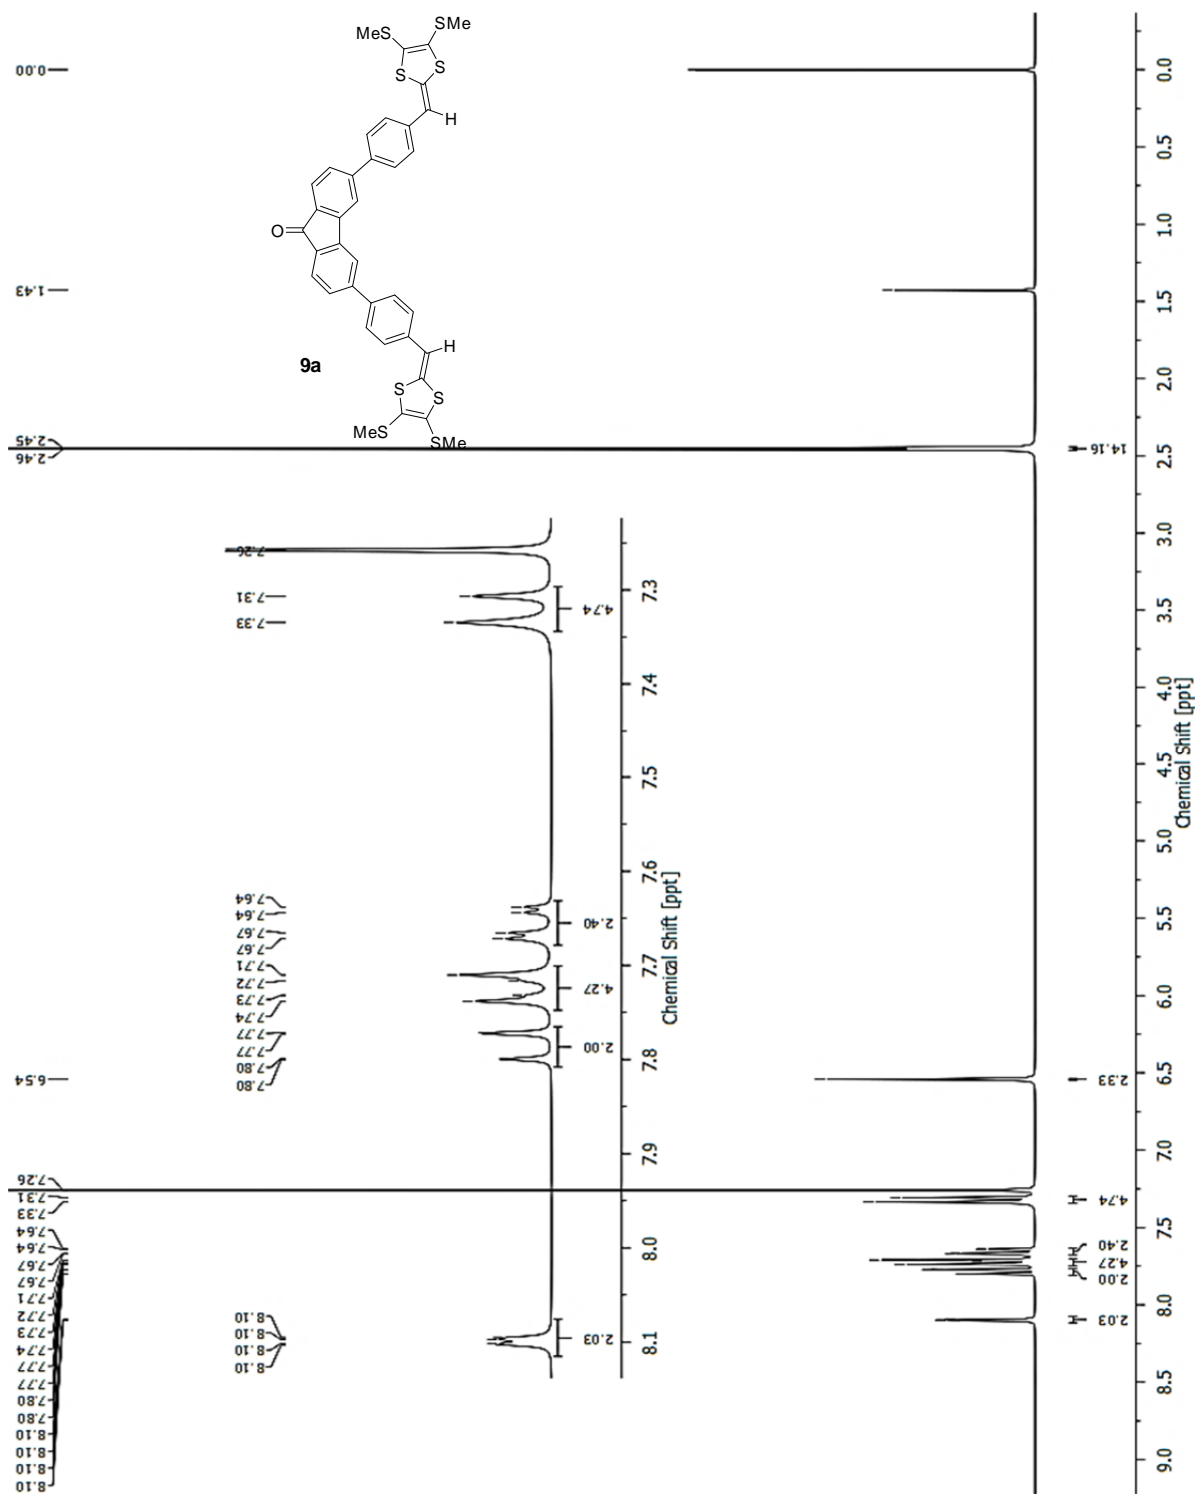

**Fig. S-9**  $^1\text{H}$  NMR (300 MHz,  $\text{CDCl}_3$ ) spectrum of compound **9a**.

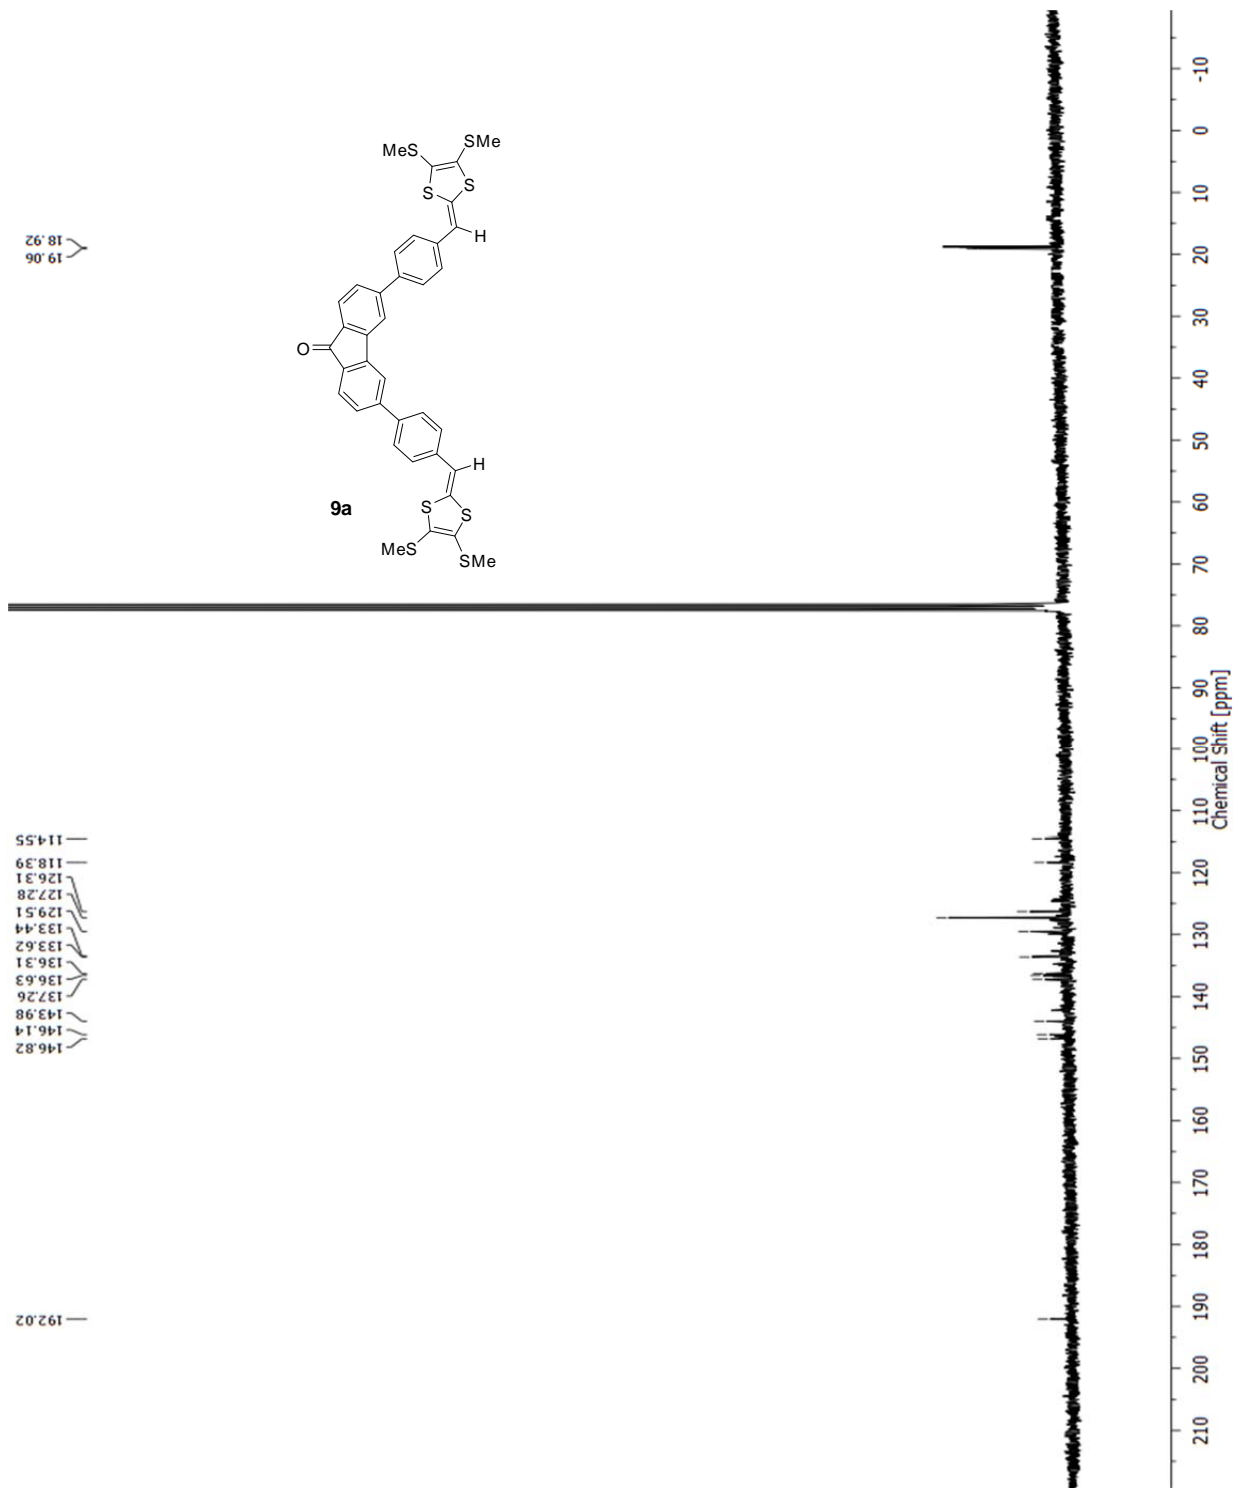

**Fig. S-10**  $^{13}\text{C}$  NMR (75 MHz,  $\text{CDCl}_3$ ) spectrum of compound **9a**.

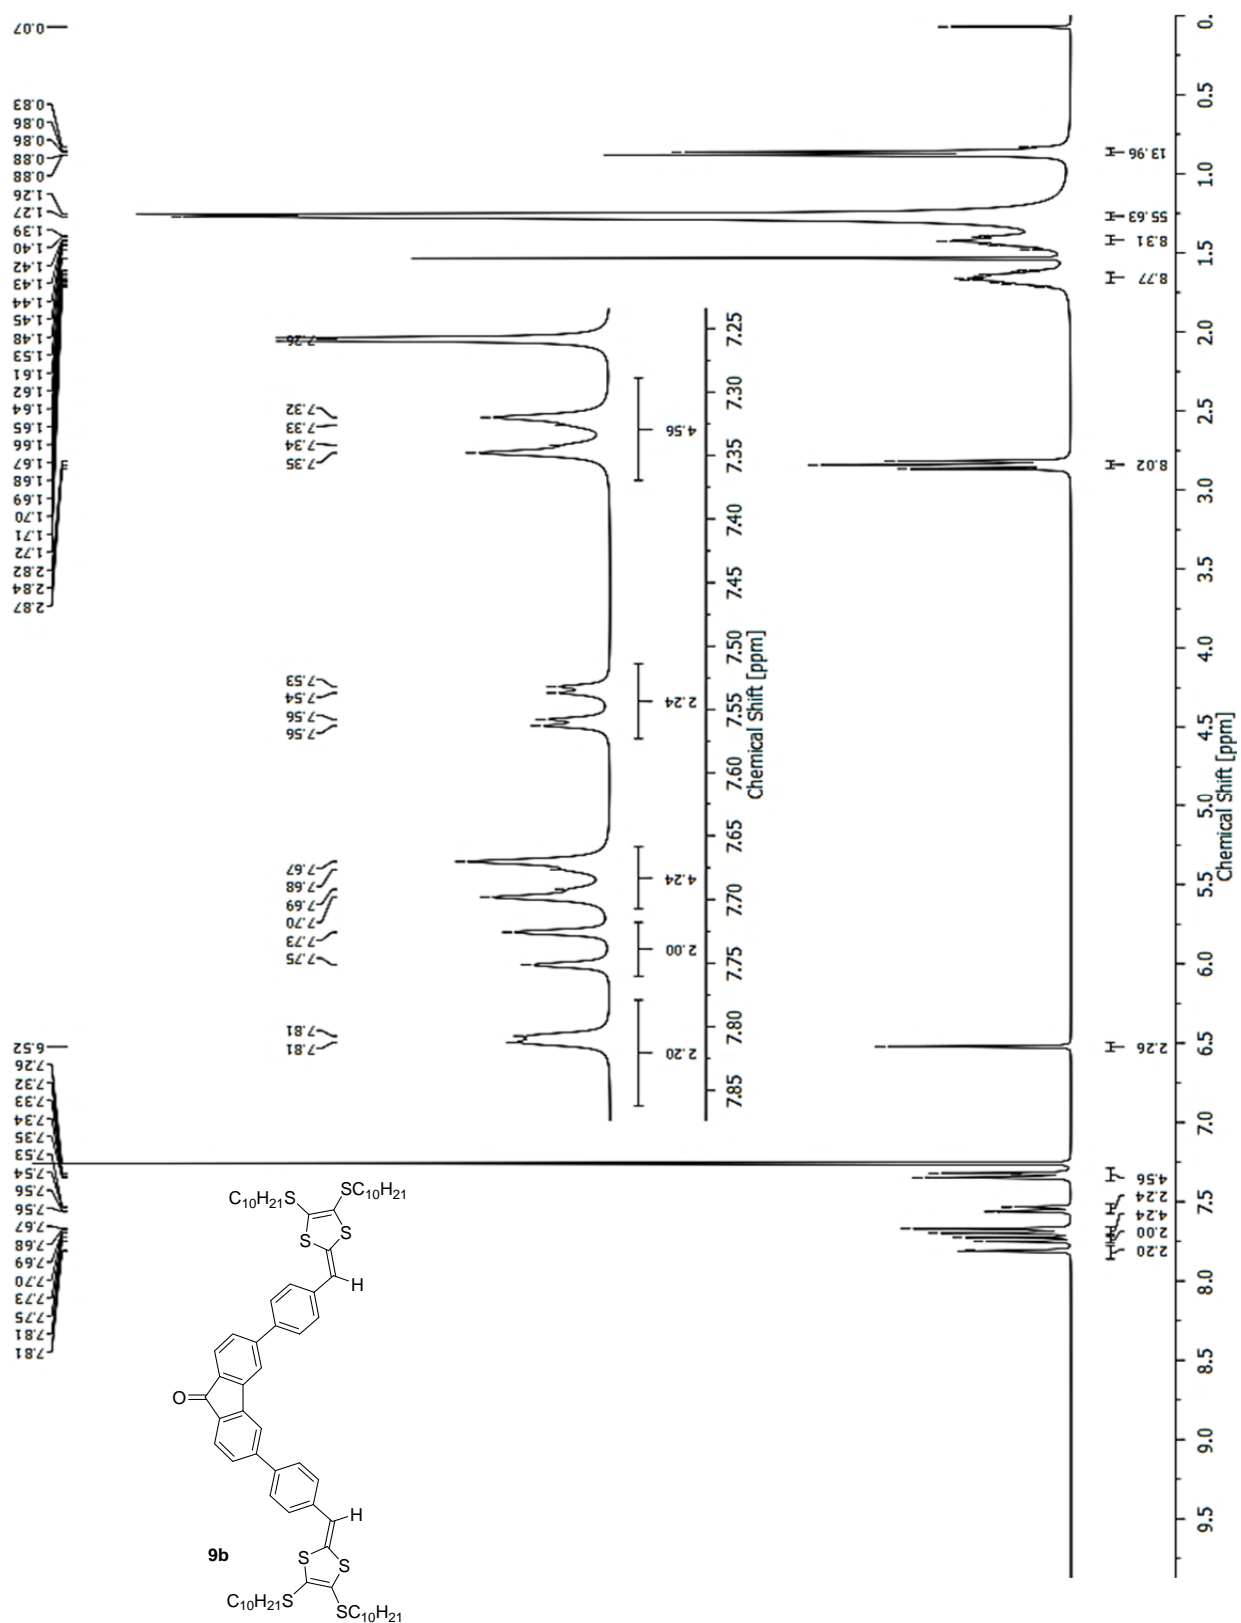

Fig. S-11  $^{13}C$  NMR (75 MHz,  $CDCl_3$ ) spectrum of compound **9b**.

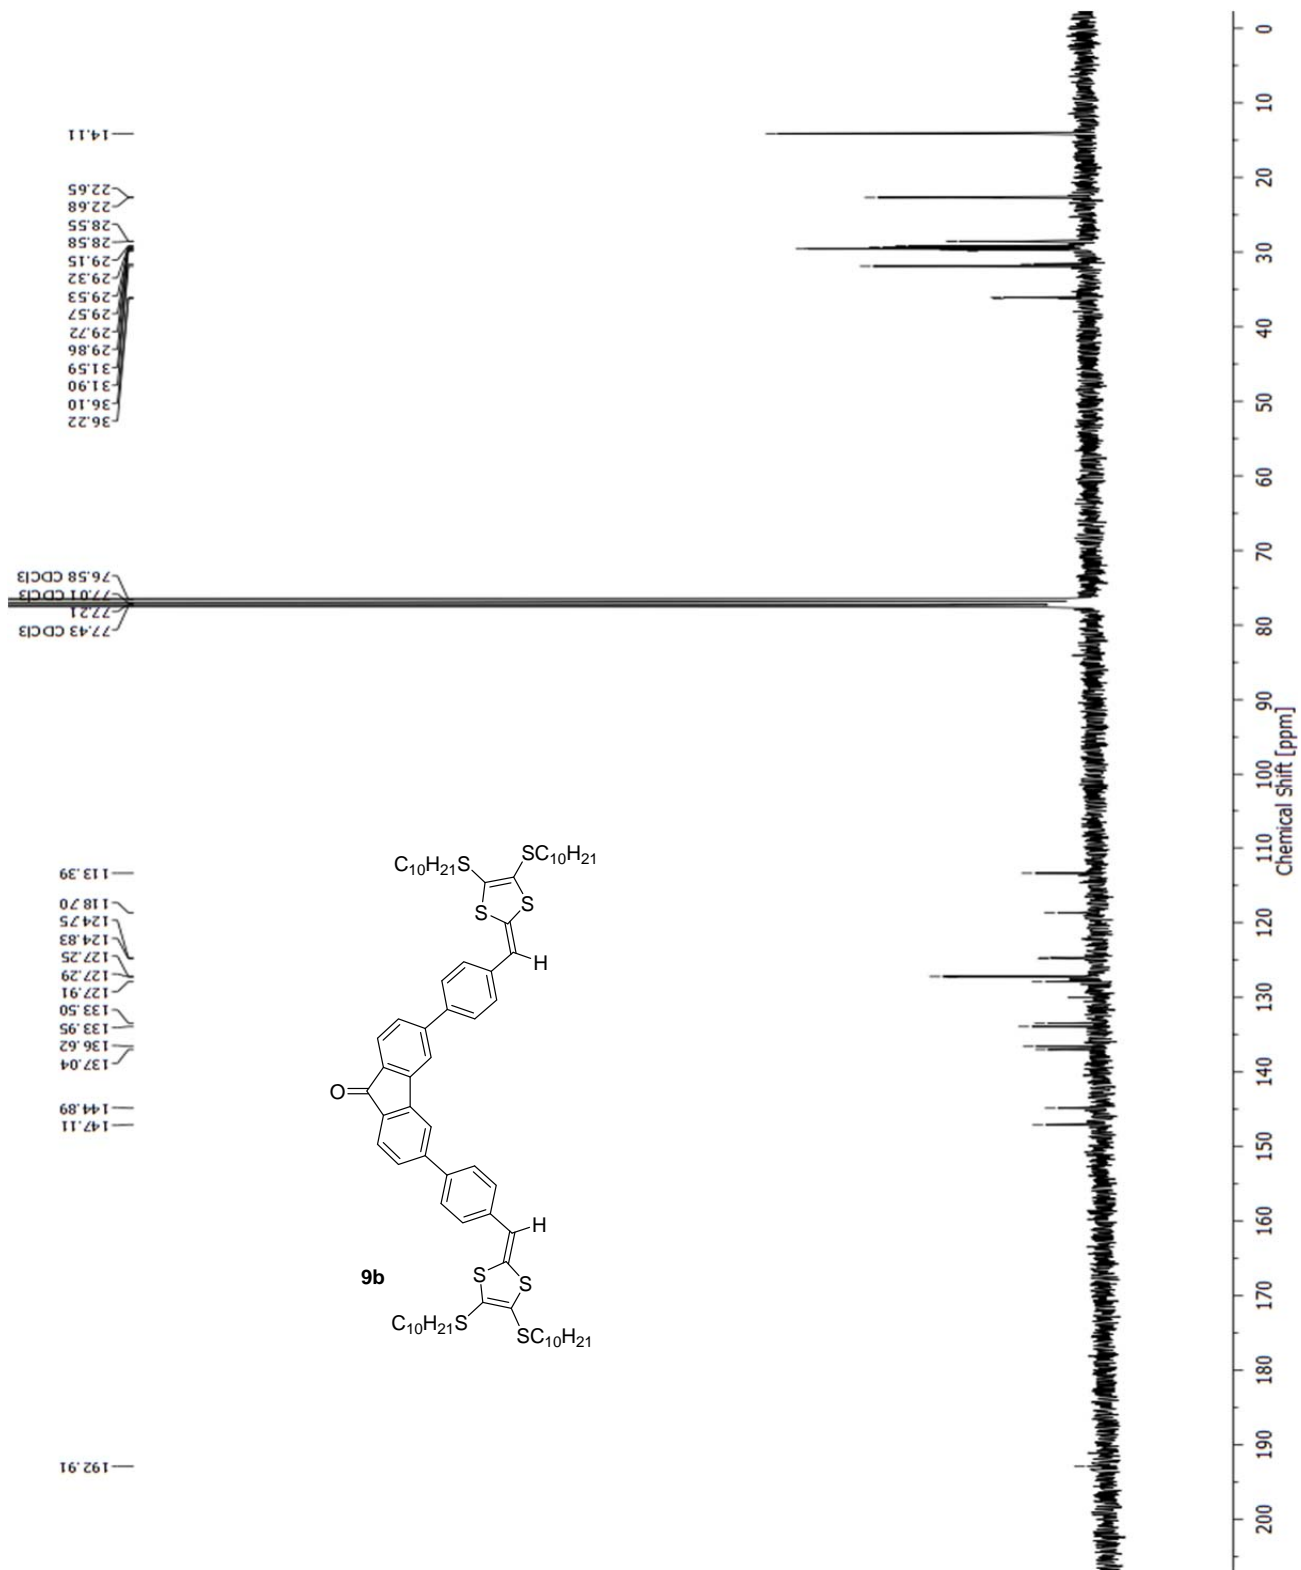

**Fig. S-12**  $^{13}\text{C}$  NMR (75 MHz,  $\text{CDCl}_3$ ) spectrum of compound **9b**.

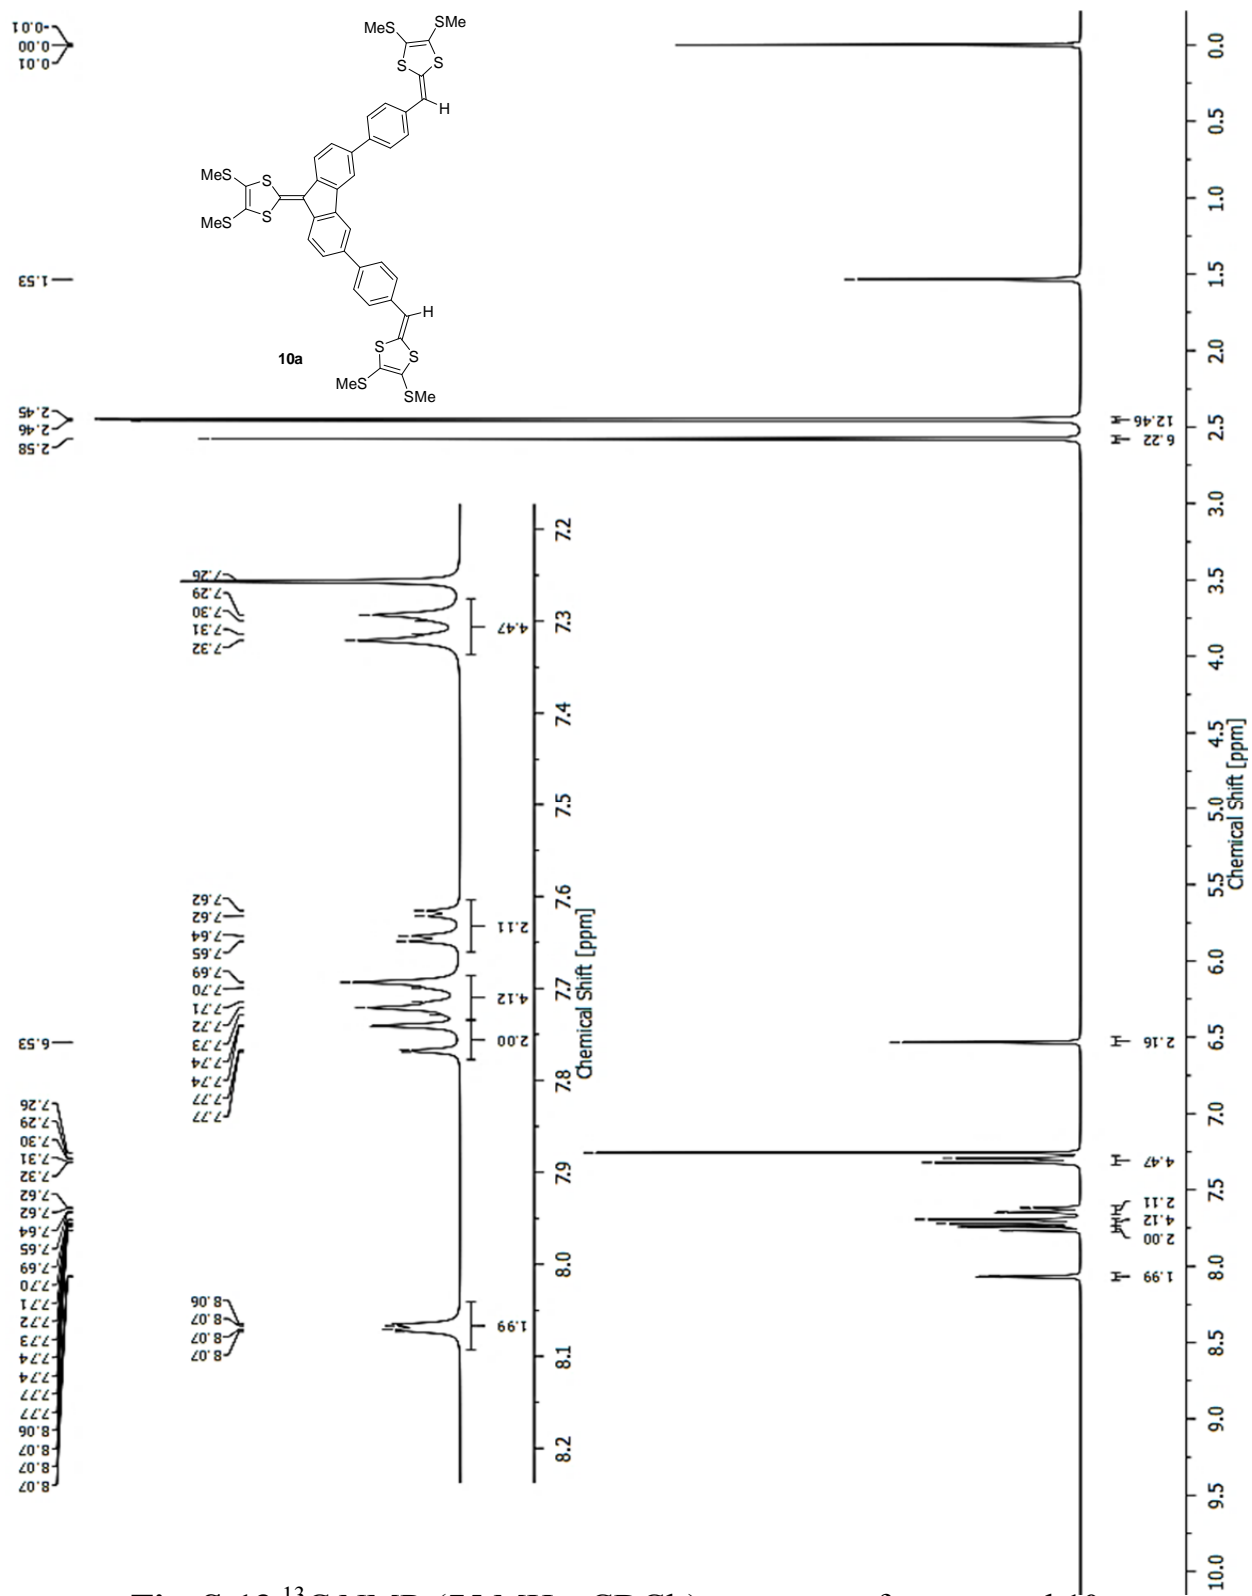

**Fig. S-13** <sup>13</sup>C NMR (75 MHz, CDCl<sub>3</sub>) spectrum of compound **10a**.

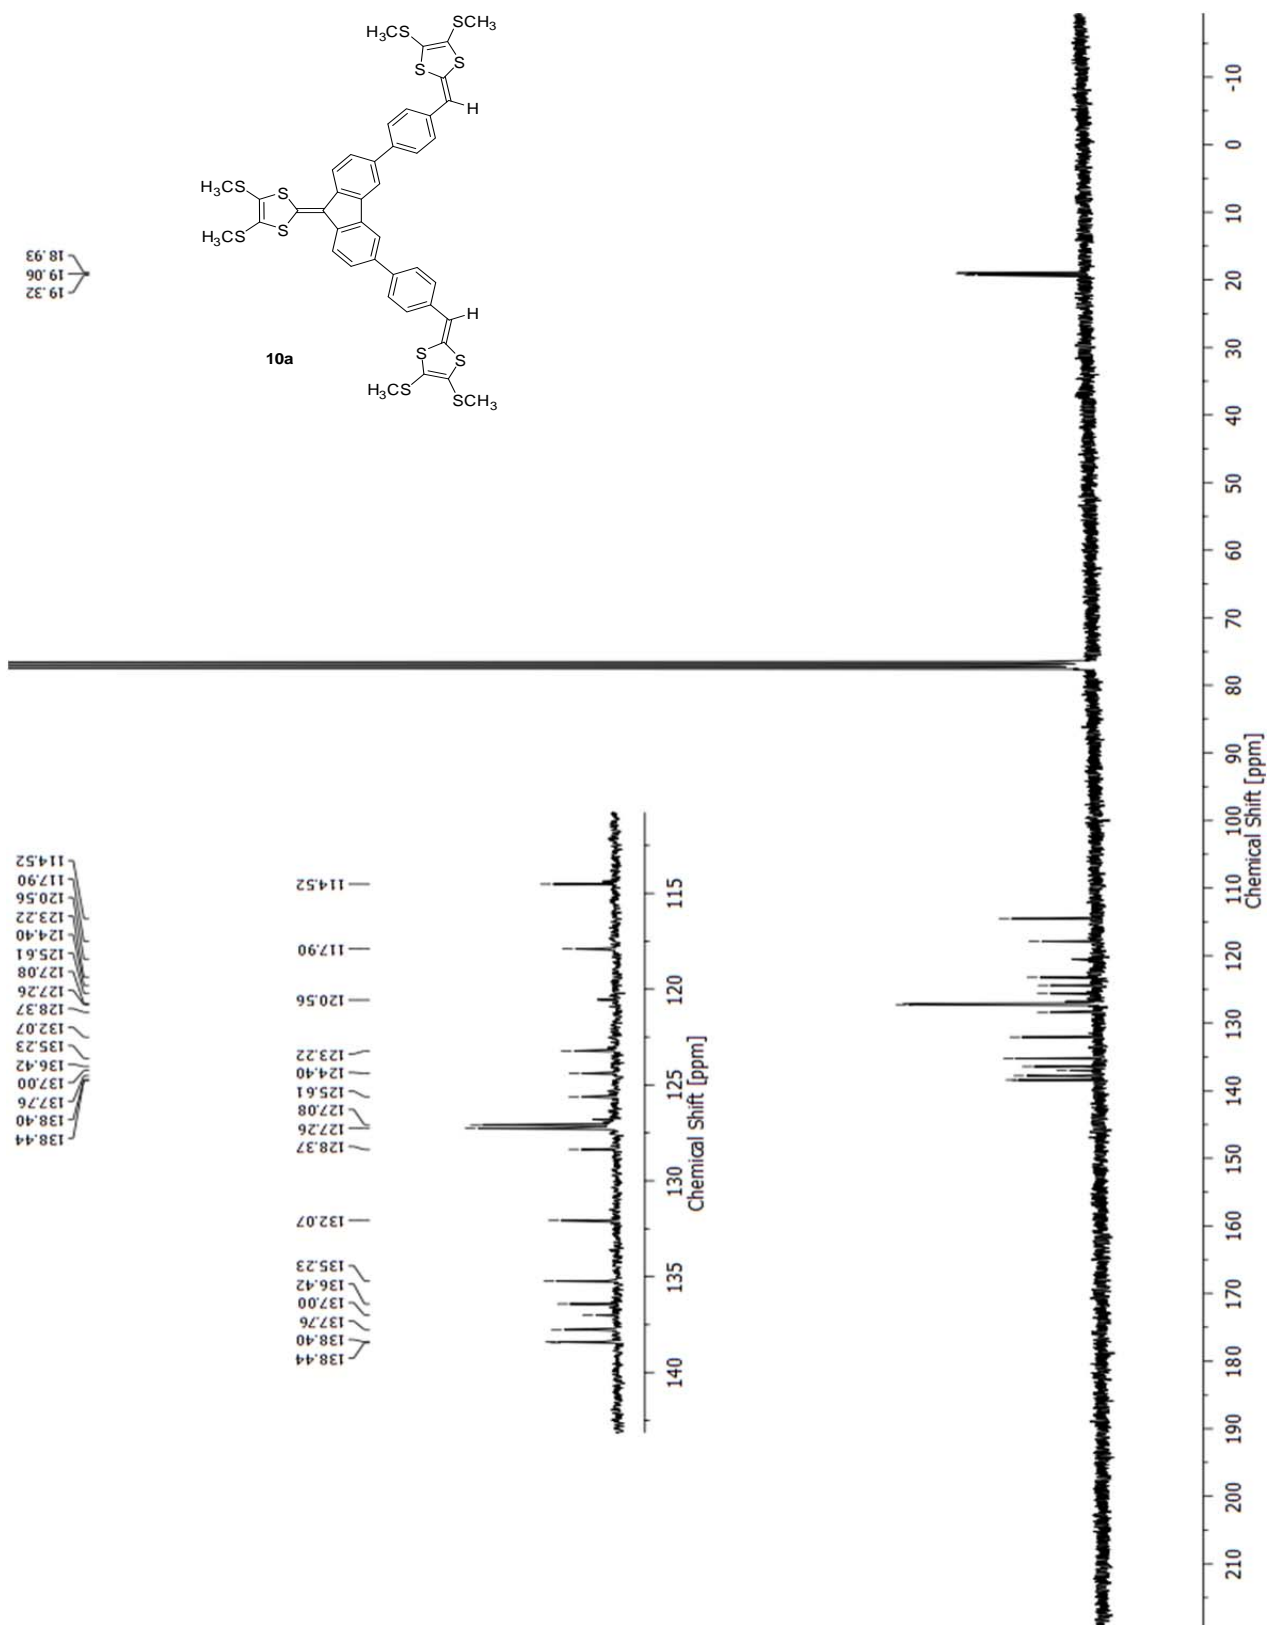

**Fig. S-14**  $^{13}\text{C}$  NMR (75 MHz,  $\text{CDCl}_3$ ) spectrum of compound 10a.

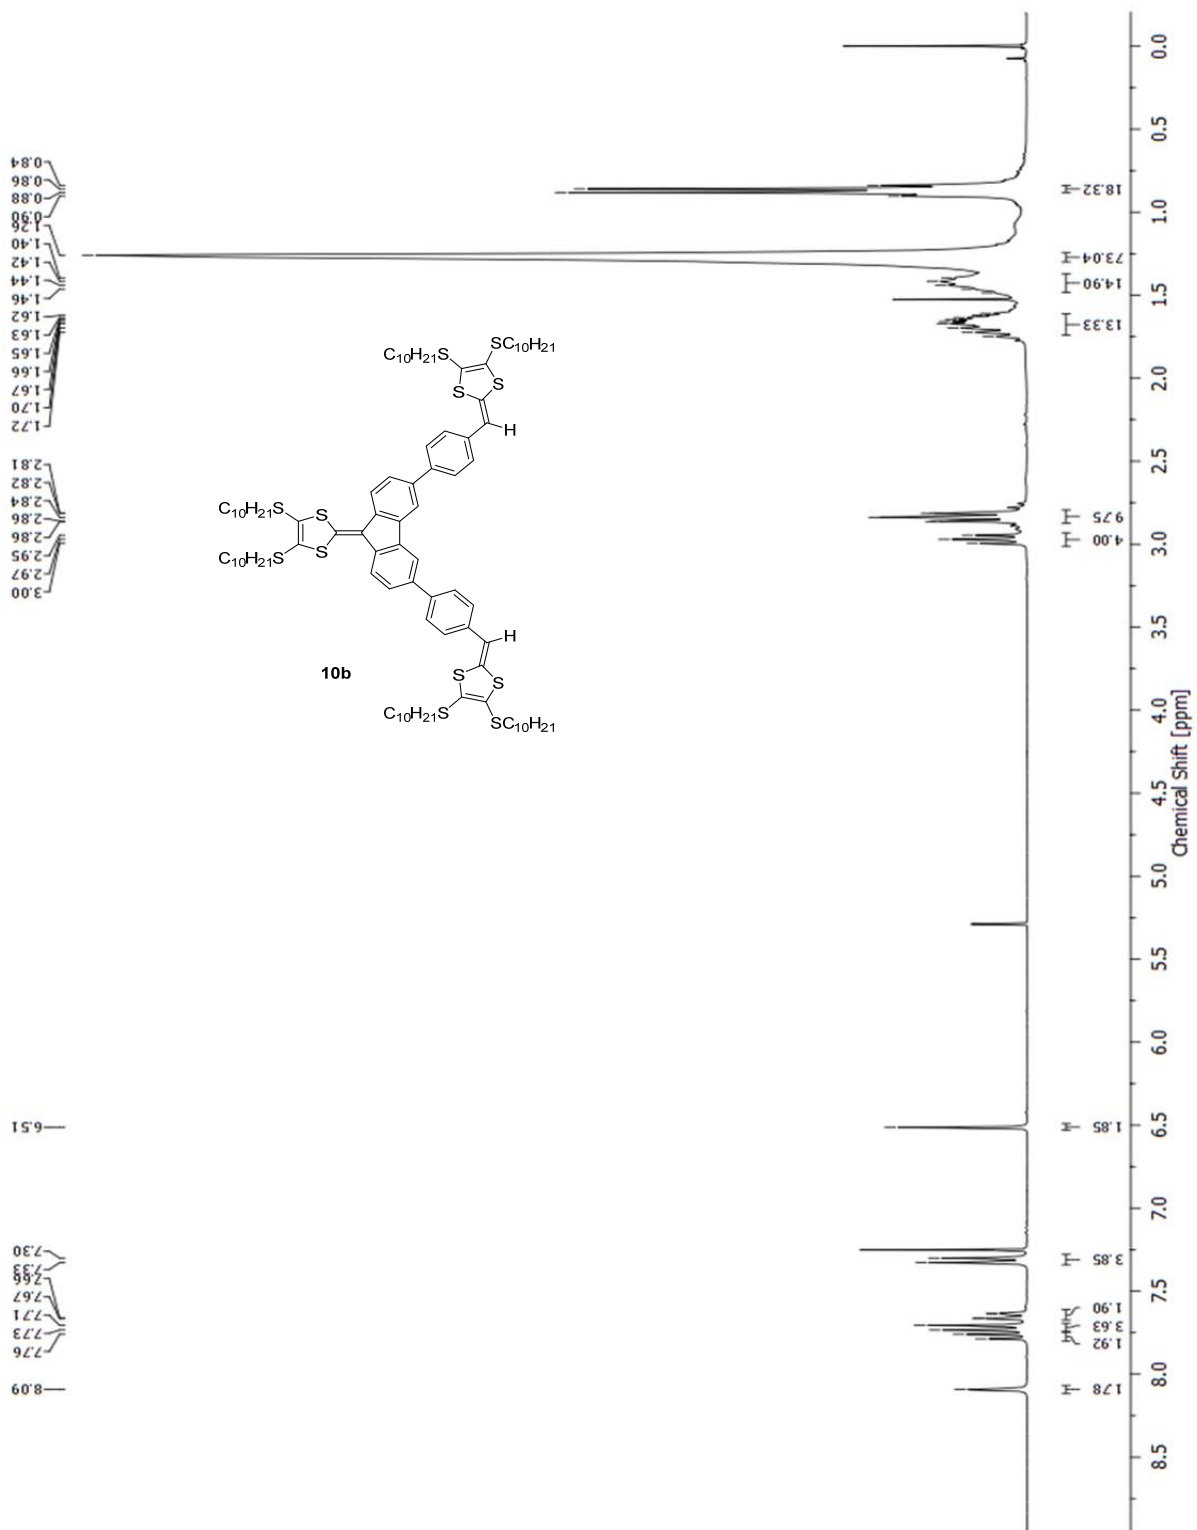

**Fig. S-15**  $^1H$  NMR (300 MHz,  $CDCl_3$ ) spectrum of compound **10b**.



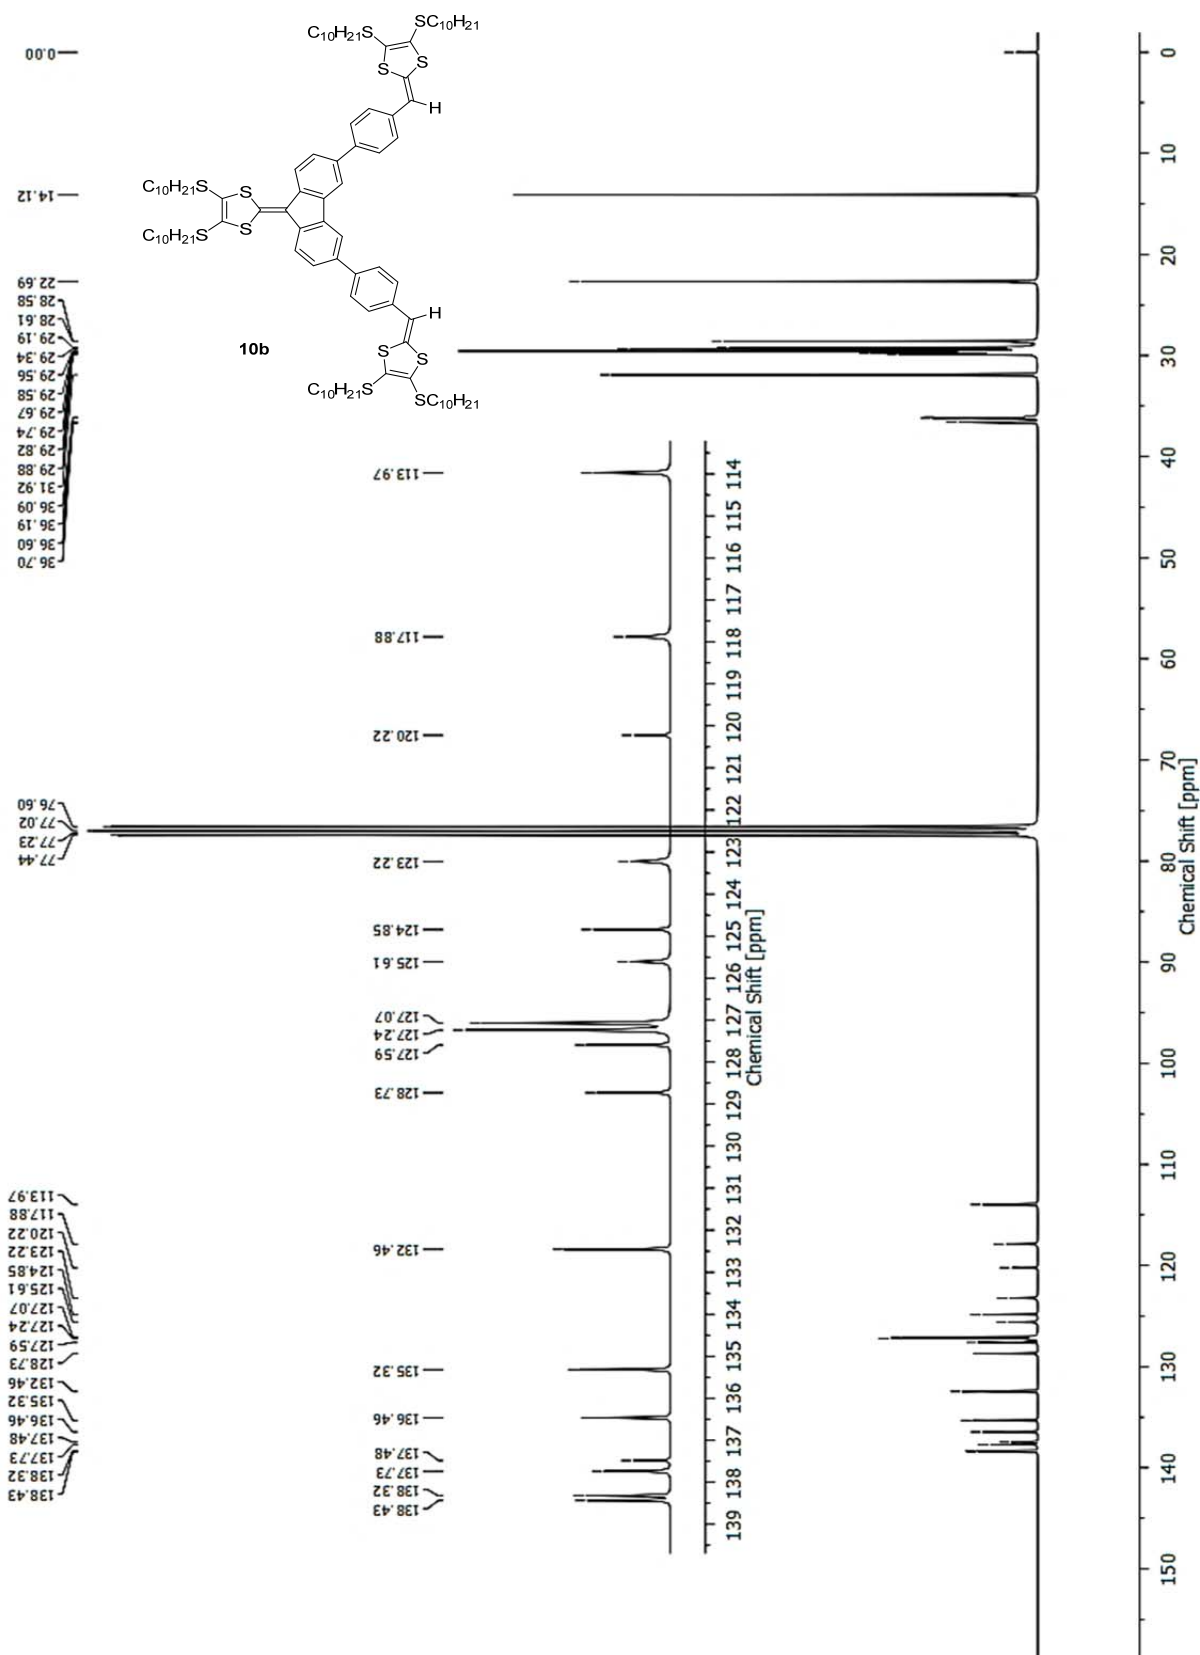

**Fig. S-16**  $^{13}C$  NMR (75 MHz,  $CDCl_3$ ) spectrum of compound **10b**.

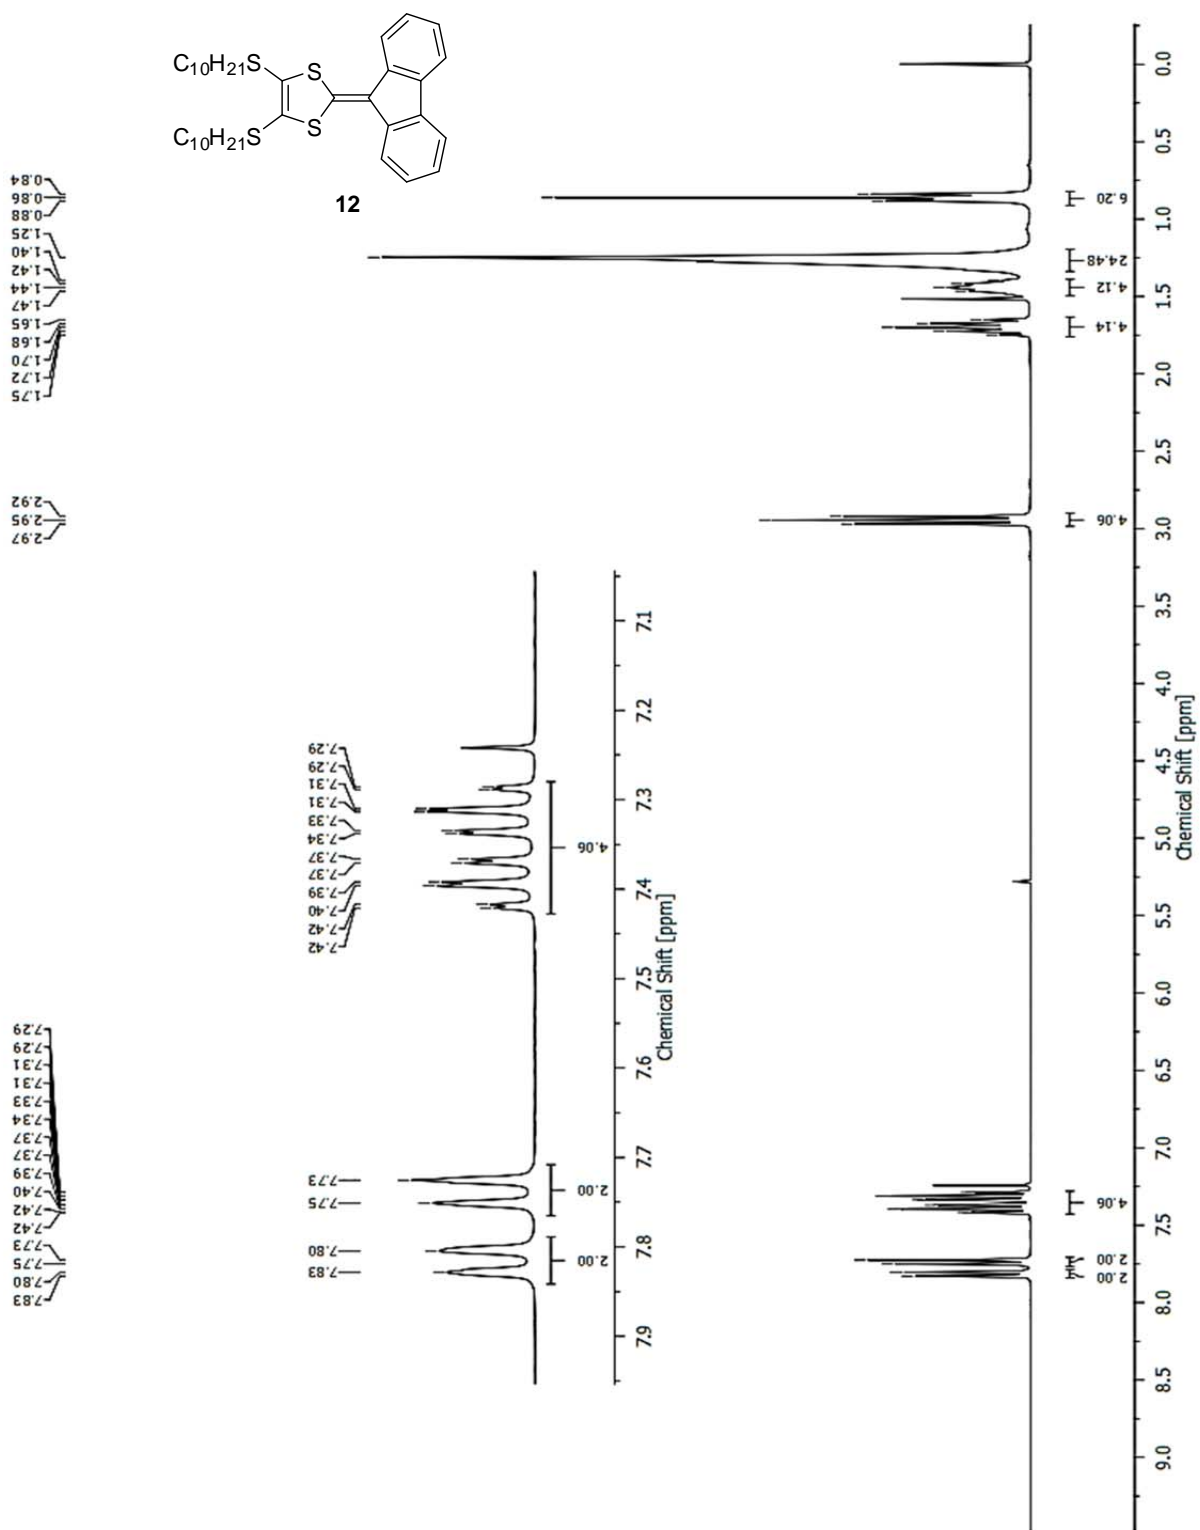

**Fig. S-17**  $^1\text{H}$  NMR (300 MHz,  $\text{CDCl}_3$ ) spectrum of compound **12**.

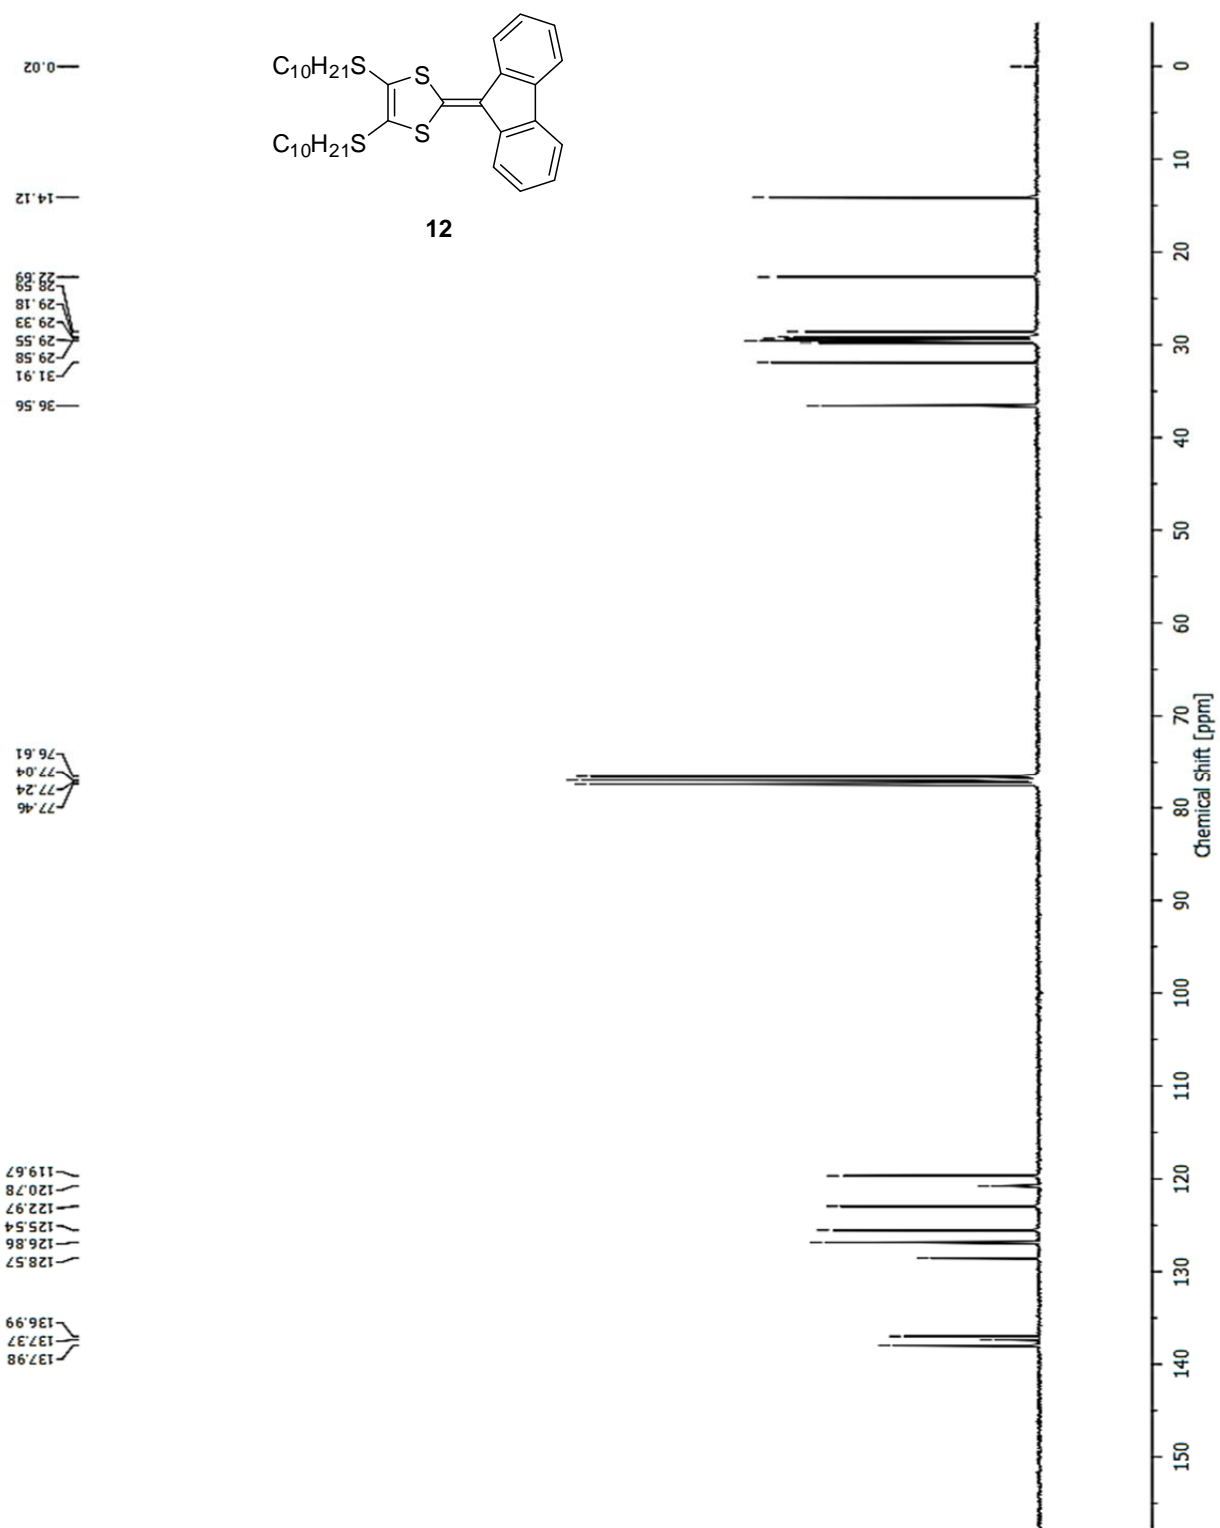

**Fig. S-18**  $^{13}C$  NMR (75 MHz,  $CDCl_3$ ) spectrum of compound 12.

## 2. UV-Vis Absorption Data

**Table S-1** Summary of UV-Vis absorption data

| entry      | $\lambda_{\text{max}} / \text{nm}$ ( $\epsilon / \text{mol}^{-1} \text{L cm}^{-1}$ )                           |
|------------|----------------------------------------------------------------------------------------------------------------|
| <b>5a</b>  | 442 ( $4.38 \times 10^2$ ), 390 ( $4.23 \times 10^3$ ), 285 ( $3.23 \times 10^3$ ), 225 ( $3.49 \times 10^3$ ) |
| <b>5b</b>  | 442 ( $4.38 \times 10^2$ ), 395 ( $3.67 \times 10^3$ ), 291 ( $2.75 \times 10^3$ ), 225 ( $3.49 \times 10^3$ ) |
| <b>6a</b>  | 388 ( $2.25 \times 10^3$ ), 347 ( $2.83 \times 10^3$ ), 265 ( $3.69 \times 10^3$ ), 228 ( $3.96 \times 10^3$ ) |
| <b>6b</b>  | 414 ( $3.58 \times 10^3$ ), 388 ( $3.98 \times 10^3$ ), 270 ( $3.23 \times 10^3$ )                             |
| <b>9a</b>  | 439 ( $2.37 \times 10^3$ ), 350 ( $3.32 \times 10^3$ ), 271 ( $3.74 \times 10^3$ ), 227 ( $3.28 \times 10^3$ ) |
| <b>9b</b>  | 445 ( $5.05 \times 10^2$ ), 285 ( $4.10 \times 10^3$ ), 228 ( $2.62 \times 10^3$ )                             |
| <b>10a</b> | 430 ( $2.21 \times 10^3$ ), 371 ( $1.91 \times 10^3$ ), 278 ( $2.38 \times 10^3$ )                             |
| <b>10b</b> | 443 ( $4.06 \times 10^3$ ), 285 ( $5.45 \times 10^3$ )                                                         |
| <b>12</b>  | 413 ( $2.06 \times 10^3$ ), 398 ( $1.93 \times 10^3$ ), 251 ( $4.39 \times 10^3$ )                             |

### 3. Crystallographic Data for Compounds 5a, 10a, and 12

**Table S-2** Crystal data and structure refinement for **5a**

---

|                                                     |                                                                               |
|-----------------------------------------------------|-------------------------------------------------------------------------------|
| Empirical formula                                   | C <sub>37</sub> H <sub>28</sub> OS <sub>8</sub>                               |
| Formula weight                                      | 745.07                                                                        |
| Temperature/K                                       | 100(2)                                                                        |
| Crystal system                                      | triclinic                                                                     |
| Space group                                         | <i>P</i> -1                                                                   |
| <i>a</i> /Å                                         | 12.8667(2)                                                                    |
| <i>b</i> /Å                                         | 19.3354(3)                                                                    |
| <i>c</i> /Å                                         | 20.7609(3)                                                                    |
| $\alpha$ /°                                         | 99.0250(10)                                                                   |
| $\beta$ /°                                          | 99.0750(10)                                                                   |
| $\gamma$ /°                                         | 97.7900(10)                                                                   |
| Volume/Å <sup>3</sup>                               | 4968.66(13)                                                                   |
| <i>Z</i>                                            | 6                                                                             |
| $\rho_{\text{calc}}$ /cm <sup>3</sup>               | 1.494                                                                         |
| $\mu$ /mm <sup>-1</sup>                             | 5.242                                                                         |
| F(000)                                              | 2316.0                                                                        |
| Crystal size/mm <sup>3</sup>                        | 0.2 × 0.07 × 0.07                                                             |
| Radiation                                           | Cu <i>K</i> α ( $\lambda$ = 1.54184)                                          |
| 2 $\theta$ range for data collection/°              | 4.384 to 154.85                                                               |
| Index ranges                                        | -16 ≤ <i>h</i> ≤ 15, -24 ≤ <i>k</i> ≤ 24, -25 ≤ <i>l</i> ≤ 26                 |
| Reflections collected                               | 97458                                                                         |
| Independent reflections                             | 20586 [ <i>R</i> <sub>int</sub> = 0.0494, <i>R</i> <sub>sigma</sub> = 0.0365] |
| Data/restraints/parameters                          | 20586/26/1360                                                                 |
| Goodness-of-fit on F <sup>2</sup>                   | 1.047                                                                         |
| Final <i>R</i> indexes [ <i>I</i> ≥ 2σ( <i>I</i> )] | <i>R</i> <sub>1</sub> = 0.0743, <i>wR</i> <sub>2</sub> = 0.1938               |
| Final <i>R</i> indexes [all data]                   | <i>R</i> <sub>1</sub> = 0.0956, <i>wR</i> <sub>2</sub> = 0.2122               |
| Largest diff. peak/hole / e Å <sup>-3</sup>         | 1.10/-1.24                                                                    |

---

**Table S-3** Crystal data and structure refinement for **10a**

---

|                                                     |                                                                 |
|-----------------------------------------------------|-----------------------------------------------------------------|
| Empirical formula                                   | C <sub>85</sub> H <sub>70</sub> Cl <sub>2</sub> S <sub>24</sub> |
| Formula weight                                      | 1931.75                                                         |
| Temperature/K                                       | 173.01(10)                                                      |
| Crystal system                                      | triclinic                                                       |
| Space group                                         | <i>P</i> -1                                                     |
| <i>a</i> /Å                                         | 9.43840(10)                                                     |
| <i>b</i> /Å                                         | 20.8406(3)                                                      |
| <i>c</i> /Å                                         | 22.59980(10)                                                    |
| $\alpha$ /°                                         | 89.3300(10)                                                     |
| $\beta$ /°                                          | 83.4290(10)                                                     |
| $\gamma$ /°                                         | 83.1130(10)                                                     |
| Volume/Å <sup>3</sup>                               | 4384.35(8)                                                      |
| <i>Z</i>                                            | 2                                                               |
| $\rho_{\text{calc}}$ /cm <sup>3</sup>               | 1.463                                                           |
| $\mu$ /mm <sup>-1</sup>                             | 6.361                                                           |
| F(000)                                              | 1996.0                                                          |
| Crystal size/mm <sup>3</sup>                        | 0.18 × 0.05 × 0.05                                              |
| Radiation                                           | Cu <i>K</i> α ( $\lambda$ = 1.54184)                            |
| 2 $\theta$ range for data collection/°              | 3.936 to 155.314                                                |
| Index ranges                                        | -11 ≤ <i>h</i> ≤ 11, -26 ≤ <i>k</i> ≤ 22, -28 ≤ <i>l</i> ≤ 28   |
| Reflections collected                               | 32975                                                           |
| Independent reflections                             | 32975 [ <i>R</i> <sub>sigma</sub> = 0.0143]                     |
| Data/restraints/parameters                          | 32975/0/1013                                                    |
| Goodness-of-fit on F <sup>2</sup>                   | 1.036                                                           |
| Final <i>R</i> indexes [ <i>I</i> ≥ 2σ( <i>I</i> )] | <i>R</i> <sub>1</sub> = 0.0539, <i>wR</i> <sub>2</sub> = 0.1514 |
| Final <i>R</i> indexes [all data]                   | <i>R</i> <sub>1</sub> = 0.0605, <i>wR</i> <sub>2</sub> = 0.1570 |
| Largest diff. peak/hole / e Å <sup>-3</sup>         | 1.11/-0.98                                                      |

---

**Table S-4** Crystal data and structure refinement for **12**

---

|                                                |                                                                  |
|------------------------------------------------|------------------------------------------------------------------|
| Empirical formula                              | C <sub>36</sub> H <sub>50</sub> S <sub>4</sub>                   |
| Formula weight                                 | 611.00                                                           |
| Temperature/K                                  | 100(2)                                                           |
| Crystal system                                 | monoclinic                                                       |
| Space group                                    | <i>P2<sub>1</sub>/n</i>                                          |
| <i>a</i> /Å                                    | 9.32000(10)                                                      |
| <i>b</i> /Å                                    | 10.2529(2)                                                       |
| <i>c</i> /Å                                    | 35.0079(5)                                                       |
| $\beta$ /°                                     | 92.2020(10)                                                      |
| Volume/Å <sup>3</sup>                          | 3342.78(9)                                                       |
| <i>Z</i>                                       | 4                                                                |
| $\rho_{\text{calc}}/\text{cm}^3$               | 1.214                                                            |
| $\mu/\text{mm}^{-1}$                           | 2.770                                                            |
| F(000)                                         | 1320.0                                                           |
| Crystal size/mm <sup>3</sup>                   | 0.25 × 0.05 × 0.04                                               |
| Radiation                                      | Cu <i>K</i> α ( $\lambda = 1.54184$ )                            |
| 2 $\theta$ range for data collection/°         | 5.052 to 155.036                                                 |
| Index ranges                                   | -11 ≤ <i>h</i> ≤ 8, -12 ≤ <i>k</i> ≤ 12, -43 ≤ <i>l</i> ≤ 44     |
| Reflections collected                          | 56658                                                            |
| Independent reflections                        | 6956 [ $R_{\text{int}} = 0.1055$ , $R_{\text{sigma}} = 0.0473$ ] |
| Data/restraints/parameters                     | 6956/0/363                                                       |
| Goodness-of-fit on F <sup>2</sup>              | 1.058                                                            |
| Final <i>R</i> indexes [ $I \geq 2\sigma(I)$ ] | $R_1 = 0.0638$ , $wR_2 = 0.1731$                                 |
| Final <i>R</i> indexes [all data]              | $R_1 = 0.0758$ , $wR_2 = 0.1868$                                 |
| Largest diff. peak/hole / e Å <sup>-3</sup>    | 0.63/-0.70                                                       |

---
